1 **Title: Ratiometric assays of autophagic flux in zebrafish for analysis of**  
2 **familial Alzheimer's disease-like mutations**

3  
4 **Authors:** Haowei Jiang<sup>1,\*</sup>, Morgan Newman<sup>1</sup>, Dhanushika Ratnayake<sup>1,2</sup>, Michael Lardelli<sup>1</sup>

5  
6 **Affiliations:** <sup>1</sup>University of Adelaide, School of Biological Sciences, Alzheimer's Disease  
7 Genetics Laboratory, North Terrace, Adelaide, SA 5005, AUSTRALIA

8 <sup>2</sup>Current Address: Monash University, Australian Regenerative Medicine Institute, Wellington  
9 Road, Clayton 3800, AUSTRALIA

10

11 **\*Corresponding Author:** Haowei Jiang, University of Adelaide, School of Biological  
12 Sciences, Alzheimer's Disease Genetics Laboratory, North Terrace, Adelaide, SA 5005,  
13 AUSTRALIA. Email: [haowei.jiang@adelaide.edu.au](mailto:haowei.jiang@adelaide.edu.au)

14

15 **Key words:** autophagy, familial Alzheimer's disease, PRESENILIN genes, zebrafish

16

17 **Abbreviations:** A $\beta$ , amyloid- $\beta$ ; AD, Alzheimer's Disease; APP, Amyloid beta A4 protein;  
18 Atg, autophagy-related gene; AV, autophagic vacuole; CQ, chloroquine; GFP, green  
19 fluorescent protein; LC3, microtubule-associated protein 1 light chain 3; PE,  
20 phosphatidylethanolamin; polyQ, poly-glutamine; PSEN, presenilin; Rapa, rapamycin

21

22 **Financial Disclosure Statement:** This research was supported by grants from the National

23 Health and Medical Research Council of Australia, GNT1061006 and GNT1126422, and by  
24 funds from the School of Biological Sciences of the University of Adelaide. HJ is supported  
25 by an Adelaide Scholarship International from the University of Adelaide.

26

27 **Conflict of Interest Statement:** The authors declare no conflict of interest.

28

29 **Abstract**

30 Protein aggregates such as those formed in neurodegenerative diseases can be degraded via  
31 autophagy. To assess changes in autophagic flux in zebrafish models of familial Alzheimer's  
32 disease (fAD) mutations, we first developed a transgene, polyQ80-GFP-v2A-GFP, expressing  
33 equimolar amounts of aggregating polyQ80-GFP and a free GFP internal control in zebrafish  
34 embryos and larvae. This assay detects changes in autophagic flux by comparing the relative  
35 strength of polyQ80-GFP and free GFP moiety signals on western immunoblots probed with  
36 an antibody detecting GFP. However, the assay's application is limited by the toxicity of  
37 polyQ80-GFP, and because aggregation of this protein may, itself, induce autophagy. To  
38 overcome these issues, we subsequently developed a similar ratiometric assay where  
39 expression of a GFP-Lc3a-GFP transgene generates initially equimolar amounts of GFP-Lc3a  
40 (directed to autophagic degradation) and a free GFP internal control. The sensitivity of this  
41 latter assay is reduced by a cellular protease activity that separates Lc3a from GFP-Lc3a, thus  
42 contributing to the apparent free GFP signal and somewhat masking decreases in autophagic  
43 flux. Nevertheless, the assay demonstrates significantly decreased autophagic flux in  
44 zebrafish lacking *presenilin2* gene activity supporting that the Presenilin2 protein, like human  
45 PRESENILIN1, plays a role(s) in autophagy. Zebrafish heterozygous for a typical fAD-like,  
46 reading-frame-preserving mutation in *psen1* show decreased autophagic flux consistent with  
47 observations in mammalian systems. Unexpectedly, a zebrafish model of the only confirmed  
48 reading-frame-truncating fAD mutation in a human *PRESENILIN* gene, the K115Efs  
49 mutation of human *PSEN2*, shows possibly increased autophagic flux in young zebrafish  
50 (larvae).

51

52 **Introduction**

53

54 Autophagic/lysosomal dysfunction is thought to be involved in the neurodegenerative process  
55 of Alzheimer's disease (AD) (1). The endosomal-lysosomal system is a prominent site for the  
56 processing of the AMYLOID BETA A4 PRECURSOR PROTEIN (APP) to form the  
57 aggregating peptide amyloid $\beta$  (A $\beta$ ) (2), which is the major component of the amyloid plaques  
58 observed in AD brains. Autophagic vacuoles (AVs) are thought to be the major reservoirs of  
59 intracellular A $\beta$ , and accumulation of immature AVs has been detected in AD brains ,  
60 suggesting that the maturation of AVs to lysosomes may be impaired (3, 4). Both full-length  
61 APP and  $\beta$ -secretase-cleaved APP are found in such AVs, which are also highly enriched in  
62 PRESENILIN (PSEN) proteins (5) (components of the  $\gamma$ -secretase complexes that cleave  
63 APP to form A $\beta$ ) suggesting that a link may exist between A $\beta$  production and cell survival  
64 pathways through activated autophagy in AD. The A $\beta$  accumulation is thought to be induced  
65 by the combination of increased autophagy induction and defective clearance of  
66 A $\beta$ -generating AVs (1).

67

68 Dominant mutations in the *PRESENILIN (PSEN)* genes cause the majority of familial, early  
69 onset AD (fAD, (6)). We have previously argued that a body of evidence supports that the  
70 AD-relevant effect of these mutations may be to alter the activity of PSEN holoproteins  
71 rather than the endoproteolysed forms that are active in the  $\gamma$ -secretase complexes that cleave  
72 APP (7). Indeed, in 2010 Lee et al. showed that changes in PSEN1 holoprotein function,

73 rather than  $\gamma$ -secretase activity, appear to affect lysosomal function in *PSEN1* fAD mutant  
74 human fibroblasts (8). However, the effects of *PSEN* fAD mutations on autophagy are  
75 currently debated (9) and it has not yet been shown that the related protein, PSEN2, plays a  
76 role in autophagic flux. Thus, the roles of the multifunctional PSEN proteins in cellular  
77 function and AD require further investigation.

78

79 Non-mammalian animal models including the zebrafish can facilitate AD research through  
80 development of rapid, novel assays for cellular processes such as autophagy. An excellent  
81 example is the fluorescent protein-based assay published by Kaizuka et al in 2016 that allows  
82 qualitative visualization of differences in autophagic flux within cells (10). However, it is  
83 also desirable to make simple, quantitative assessments of relative differences in autophagic  
84 flux in whole tissues/animals e.g. when these are subjected to different drug treatments or  
85 have different genotypes. In this paper we describe the development of two,  
86 internally-controlled assays using zebrafish embryos/larvae that allow rapid quantitative  
87 comparison of relative autophagic flux using western immunoblotting. We describe  
88 exploitation of the superior of these two assays to demonstrate that activity of the zebrafish  
89 *PSEN2*-orthologous gene, *psen2*, is required for efficient autophagy. We also investigate  
90 changes in autophagic flux in two novel zebrafish models of fAD-like mutations in the  
91 human *PSEN* genes. While a typical, reading frame-preserving fAD-like mutation in  
92 zebrafish *psen1* significantly decreases autophagic flux, a model of the only known reading  
93 frame-truncating *PSEN* fAD mutation does not and may possibly increase autophagic flux in  
94 young fish.

95

## 96 **Methods and Materials**

97

### 98 **Zebrafish husbandry and animal ethics**

99 All the wild-type and mutant zebrafish were maintained in a recirculated water system. All  
100 work with zebrafish was conducted under the auspices of the Animal Ethics Committee of the  
101 University of Adelaide.

102

### 103 **Construction of the polyQ80-GFP-v2A-GFP transgene**

104 A DNA sequence coding for polyQ80-GFP-v2A-GFP (Fig 2A and S1 File A) was synthesized  
105 by Biomatik Corp. and subsequently ligated into the pT2AL200R150G (Tol2  
106 transposon-based) (S1 File D) gene transfer vector for expression from the  
107 ubiquitously-transcribed elongation factor 1 alpha promoter (EF1 $\alpha$ -p) (11). The  
108 polyQ80-GFP-v2A-GFP transgene codes for two proteins, an 80-residue polyglutamine  
109 repeat sequence (polyQ80) fused to the N-terminal of GFP protein as well as a free GFP  
110 protein. A viral 2A peptide (v2A) sequence between the two GFP sequences allows their  
111 synthesis as separate entities by a “ribosomal-skip” mechanism (12). Thus, translation of  
112 polyQ80-GFP-v2A-GFP mRNA gives 1:1 stoichiometric synthesis of polyQ80-GFP and free  
113 GFP. PolyQ80-GFP subsequently aggregates and should be degraded by autophagy, while the  
114 free GFP remains soluble in the cytosol to act as an internal control.

115

116 **Fig 2. Design of three GFP-based constructs for assay of autophagic flux.**

117 (A) Transgene PolyQ80-GFP-v2A-GFP.

118 (B) Transgene GFP-Lc3a-GFP.

119 (C) Transgene GFP-Lc3a.

120

### 121 **Construction of the GFP-Lc3a-GFP transgene**

122 A sequence coding for GFP-Lc3a-GFP (Fig 2B and S1 File B) was synthesized by Biomatik  
123 and ligated into the pT2AL200R150G (13) gene transfer vector (S1 File D). This construct  
124 encodes a fusion protein where GFP is linked to the N-terminal of zebrafish Lc3a which, at  
125 its C-terminal, is linked to an additional GFP. When this transgene is expressed in cells, the  
126 most C-terminal glycine residue of Lc3a is cleaved by an endogenous ATG4 family protease,  
127 producing equimolar amounts of GFP-Lc3a and free GFP. GFP-Lc3a is conjugated to PE and  
128 localizes to autophagosomes (10). The GFP-Lc3a molecules attached to the autophagosomal  
129 inner membrane are subsequently degraded after fusion with lysosomes, while those on the  
130 outer membrane are deconjugated by Atg4 proteins and recycled back to the cytosol. The free  
131 GFP exists in the cytoplasm and functions as an internal control. Relative autophagic activity  
132 is measured as changes in the ratio of GFP-Lc3a / free GFP via western immunoblotting.

133

### 134 **Construction of the GFP-Lc3a transgene**

135 The GFP-Lc3a transgene (Fig 2C and S1 File C) in the pT2AL200R150G vector was derived  
136 from GFP-Lc3a-GFP by PCR amplification using 5'-phosphorylated primers to exclude the  
137 downstream GFP coding sequence followed by ligation to recircularise the plasmid. The

138 sequences of the PCR primers used were 5'-TAGATCGATGATGATCCAGACATGA-3' and  
139 5'-GCAGCCGAAGGTCTCCT-3'.

140

### 141 **Zebrafish embryos**

142 Three mutations were involved in our research, a putatively null mutation in zebrafish *psen2*,  
143 *psen2*<sup>S4Ter</sup>, a model of a typical reading-frame-preserving fAD-type mutation in *psen1*,  
144 *psen1*<sup>Q96K97del</sup>, and a model of human *PSEN2*<sup>K115Efs</sup> (14), *psen1*<sup>K97Gfs</sup>. Descriptions of the  
145 generation of these mutations were listed in S3 File.

146

147 Five different genotypes of zebrafish embryos, Tübingen (TU) wildtype (+/+), putatively  
148 *psen2* null heterozygous (*psen2*<sup>S4Ter/+</sup>), putatively *psen2* null homozygous  
149 (*psen2*<sup>S4Ter/psen2</sup><sup>S4Ter</sup>), *psen1*<sup>Q96K97del</sup> heterozygous (*psen1*<sup>Q96K97del/+</sup>), and *psen1*<sup>K97Gfs</sup>  
150 heterozygous (*psen1*<sup>K97Gfs/+</sup>), were spawned either by mass mating or pair-mating of  
151 individuals.

152

### 153 **Microinjection of zebrafish embryos**

154 For the polyQ80-GFP-v2A-GFP assay, zebrafish zygotes were injected with ~5-10 nL of a  
155 solution containing 25ng/μL of the polyQ80-GFP-v2A-GFP transgene with 25ng/μL of Tol2  
156 transposase mRNA (11). For the GFP-Lc3a-GFP and GFP-Lc3a assays, zebrafish zygotes  
157 were injected with ~5-10 nL of a solution of 50ng/μL of the GFP-Lc3a-GFP or GFP-Lc3a  
158 transgenes respectively with 25ng/μL of the Tol2 transposase mRNA. The injected embryos  
159 were incubated at 28.5°C in E3 medium (15). At ~24 hours post fertilization (hpf), embryos



160 showing widely distributed GFP expression (as visualized by fluorescence microscopy) were  
161 selected for subsequent analysis (Fig 1).

162

163 **Fig 1. Experimental flow chart.**

164

165 **Rapamycin and Chloroquine treatments**

166 For the PolyQ80-GFP-v2A-GFP assay, GFP-expressing zebrafish embryos from  
167 microinjection of polyQ80-GFP-v2A-GFP were separated randomly into three groups at ~30  
168 hpf. Two groups were treated with either 1 $\mu$ M rapamycin (Rapa) (SIGMA, R8781) or 50mM  
169 chloroquine (CQ) (SIGMA, C6628) from 30 hpf until 48 hpf, with one group remaining  
170 untreated as a control. The embryos were chilled and then lysed for western immunoblotting  
171 at ~48 hpf.

172

173 For the GFP-Lc3a-GFP assay (or GFP-Lc3a expression analysis) at 48 hpf in +/+ embryos,  
174 GFP-expressing zebrafish embryos from microinjection were separated randomly into four  
175 groups at ~24 hpf. Three of these groups were treated with rapamycin (1 $\mu$ M) or chloroquine  
176 (50 $\mu$ M or 50mM) from 30 hpf until 48 hpf, and the remaining group remained untreated as a  
177 control. The embryos were chilled and then lysed immediately for western immunoblotting at  
178 ~48 hpf.

179

180 For the GFP-Lc3a-GFP assay (or GFP-Lc3a expression analysis) at 96 hpf in +/+ larvae,  
181 GFP-expressing zebrafish embryos from microinjection were selected at ~24 hpf and

182 randomly separated into several groups for treatment with rapamycin (1 $\mu$ M) or chloroquine  
183 (various concentrations) from 78 hpf until 96 hpf. Larvae were then chilled and lysed  
184 immediately for western immunoblotting at ~96 hpf.

185

#### 186 **Western immunoblot analyses**

187 48 and 52 hpf-old embryos were firstly dechorionated and deyolked and then placed in  
188 sample buffer (2% sodium dodecyl sulphate (SDS), 5%  $\beta$ -mercaptoethanol, 25% v/v glycerol,  
189 0.0625 M Tris-HCl [pH 6.8], and bromophenol blue) (16), heated immediately to 95°C for  
190 10 min and then sonicated (Diagenode Bioruptor UCD-200) in an ice-water bath at high  
191 power mode for 10 min before loading onto polyacrylamide gels for electrophoresis (see  
192 below). The 96 hpf-old larvae were not deyolked before lysis in sample buffer.

193

194 Samples were loaded onto NuPAGE™ 4-12% Bis-Tris Protein Gels (Invitrogen,  
195 NP0323BOX), and the separated proteins were subsequently transferred to nitrocellulose  
196 membrane (BIO-RAD, 1620115) using the Mini Gel Tank and Blot Module Set (Life  
197 technologies, NW2000). The nitrocellulose membranes were subsequently blocked with  
198 blocking reagent (Roche, 11921681001) and then probed with the primary antibody,  
199 polyclonal anti-GFP goat (ROCKLAND™, 600-101-215), followed by secondary antibody,  
200 horseradish peroxidase (HRP) conjugated anti-goat antibody (ROCKLAND™, 605-703-125).  
201 Finally, bound antibody was detected by chemiluminescence using SuperSignal™ West Pico  
202 PLUS Chemiluminescent Substrate (ThermoFisher, 34580). The ChemiDoc™ MP Imaging  
203 System (Bio-Rad) was used to image all the western immunoblots. The intensity of each band

204 from western immunoblots was measured by Image Lab™ Software (Bio-Rad). All these  
205 intensity data are presented in S2 File.

206

### 207 **Statistical tests**

208 F-tests were first applied between different groups of data. If the p value of the F-test  
209 was  $>0.05$ , reflecting no significant difference between the variances of two groups, then a  
210 two-tailed t-test assuming equal variances was applied to the two groups. If the p value of the  
211 F-test was  $<0.05$ , reflecting a significant difference between the variances of two groups, then  
212 a two-tailed t-test assuming unequal variances was applied to the two groups.

213

## 214 **Results**

215

### 216 **PolyQ80-based autophagy assay in zebrafish**

217 The viral 2A (v2A) system for simultaneous, stoichiometric expression of two peptides from  
218 single mRNA transcripts was first applied in zebrafish by Provost et al. (12). The presence of  
219 the v2A linker in a coding sequence causes ribosomes to “skip” production of a peptide bond  
220 without terminating translation. We sought to exploit this to adapt Ju et al.’s polyQ80-based  
221 assay of autophagic flux (described in 2009) to zebrafish. Ju et al expressed fusions to  
222 luciferase of aggregating polyQ80 and non-aggregating polyQ21 in separate thigh muscles of  
223 mice (17). As a more direct measure of protein concentration we sought to measure by  
224 western immunoblotting the relative amounts of a polyQ80-GFP fusion and free GFP when  
225 these are translated in a 1:1 ratio from a single mRNA (Figures 1 and 2A). The

226 polyQ80-GFP-v2A-GFP transgene expressing these proteins is carried in a Tol2 transposon  
227 vector and introduced into fertilized zebrafish eggs by microinjection together with  
228 transposase mRNA (see Materials and Methods, Fig 2A) (Note: We initially developed a  
229 polyQ80-GFP-v2A-mCherry-based system but this required immunoblotting against GFP  
230 followed by stripping and reprobing the blot to detect mCherry, and the expression ratios thus  
231 produced were then only comparable between the samples on individual blots – data not  
232 shown.) To allow stable propagation of the polyQ80-GFP-v2A-GFP transgene in *Escherichia*  
233 *coli* (i.e. to avoid recombination between the directly repeated GFP coding sequences) we  
234 introduced numerous silent mutations into the degenerate codon positions in the downstream,  
235 free GFP coding sequence (see Supplementary Data File 1).

236

237 Injection of the polyQ80-GFP-v2A-GFP transgene into fertilized zebrafish eggs results in its  
238 widespread insertion into the chromosomes of embryonic cells. Expression of GFP is  
239 detectable for weeks afterwards although the transgene does not appear to transmit through  
240 the germline (data not shown). Western immunoblotting of embryos (up to 48 hours post  
241 fertilization, hpf) or larvae (after 48 hpf) from these injected eggs identified three expected  
242 bands of protein: a small fraction of full-length polyQ80-GFP-v2A-GFP, and greater amounts  
243 of separated polyQ80-GFP and free GFP proteins (Fig 3A).

244

245 **Fig 3. polyQ80-GFP-v2A-GFP assay of autophagy.**

246 (A) Western immunoblots from polyQ80-GFP-v2A-GFP-injected *+/+* embryos at 48 hpf after  
247 treatment with rapamycin (Rapa) or chloroquine (CQ).

248 (B) Ratios (polyQ80-GFP / free GFP) in polyQ80-GFP-v2A-GFP-injected +/+ embryos at  
249 48 hpf after treatment with Rapa or CQ. Means with standard deviations (SDs) are shown.

250 (C) Western immunoblots from polyQ80-GFP-v2A-GFP-injected +/+ embryos at 24 hpf, 48  
251 hpf, 72 hpf, and 96 hpf.

252 (D) Ratios (polyQ80-GFP / free GFP) in polyQ80-GFP-v2A-GFP-injected +/+ embryos at 24  
253 hpf, 48 hpf, 72 hpf, and 96 hpf. Means with SDs are indicated.

254

255 An advantage of zebrafish over mammalian models is the easy treatment of their living  
256 embryos with drugs by placement of these in the embryos' aqueous support medium for  
257 direct absorption. (The absorption of less soluble drugs can be facilitated by co-exposure to 1%  
258 DMSO, e.g. (18)). To test whether polyQ80-GFP was being degraded by autophagy  
259 selectively relative to free GFP we sought to enhance autophagy induction or block  
260 autophagic flux using rapamycin, (19) or chloroquine (20). Both drugs have previously been  
261 used successfully to modulate autophagy in zebrafish (19, 21).

262

263 In zebrafish embryos, autophagy is up-regulated at the pharyngula stage (24~48 hpf), and the  
264 earliest time point at which the phosphatidylethanolamin (PE)-Lc3-II conjugate (critical for  
265 autophagy induction) has been detected is 32 hpf (22). Therefore, in our research, injected  
266 embryos were exposed to 1 $\mu$ M rapamycin or 50mM chloroquine from 30 hpf before lysis at  
267 48 hpf for analysis. The ratios of polyQ80-GFP to free GFP observed from both drug  
268 treatments compared to non-treatment controls are presented in Fig 3B. The ratio  
269 (poly80Q-GFP / free GFP) was significantly reduced through rapamycin treatment

270 ( $p=0.0090$ ), indicating that autophagy was induced. The ratio (poly80Q-GFP / free GFP) was  
271 apparently increased through chloroquine treatment ( $p=0.0708$ ), consistent with inhibition of  
272 autophagy. Since the changes in the ratios of poly80Q-GFP / free GFP are consistent with the  
273 changes in autophagy expected from these different drug treatments, the  
274 polyQ80-GFP-v2A-GFP assay appears able to measure autophagic flux in zebrafish.

275

276 The polyQ80-GFP / free GFP ratio observed from the polyQ80-GFP-v2A-GFP transgene  
277 possibly decreases between 24 hpf and 96 hpf as indicated by a statistically non-significant  
278 trend (Fig 3C and 3D) Also, we noticed that this assay itself is somewhat toxic to zebrafish  
279 embryos with approximately half of the injected embryos showing abnormal development at  
280 24 hpf (data not shown). This may be due to the previously observed toxicity of  
281 polyglutamine proteins in zebrafish (23, 24). Furthermore, in 2007, Schiffer et al. reported  
282 that polyQ102-GFP could aggregate to form large SDS-insoluble inclusions, while free GFP  
283 was observed to be produced by removal of polyQ moieties from polyQ-GFP fusion proteins  
284 (23). All these phenomena might introduce unanticipated variability into observed polyQ80 /  
285 free GFP ratios (although this can be overcome somewhat by the extensive experimental  
286 replication that is facilitated by use of the zebrafish model system). For this reason we sought  
287 a less-toxic, aggregation-independent, but still internally-controlled alternative assay system.

288

### 289 **GFP-LC3-GFP probe to quantify autophagic flux by western immunoblotting**

290 In 2016, Kaizuka et al. (10) described constructs to visualize autophagic flux in zebrafish  
291 embryos. Their GFP-LC3-RFP fusion protein is cleaved into separate GFP-LC3 and RFP

292 proteins by embryos' endogenous ATG4 activity. The GFP-LC3 then associates with  
293 autophagosomes while the RFP acts as an internal control.

294

295 We wished to adapt the assay from Kaizuka et al. to allow quantification of autophagic flux  
296 by western immunoblotting while avoiding the difficulties posed by use of polyQ80-GFP.  
297 However, we knew from previous unpublished work with GFP-v2A-RFP fusion proteins that  
298 use of an RFP internal control for normalization of GFP expression is problematic since  
299 results are only comparable between samples on the same immunoblot. This difficulty could  
300 be overcome if GFP served both as autophagy target and as the internal control. Therefore we  
301 applied the tandem GFP principle of the polyQ80-GFP-v2A-GFP construct to create  
302 GFP-LC3-GFP. This is cleaved by ATG4 within cells to give, initially, equimolar amounts of  
303 GFP-LC3 and free GFP proteins (Fig 2B). When assayed, these proteins have discernibly  
304 different molecular masses identifiable on western immunoblots probed with a single  
305 anti-GFP primary antibody (Fig 2B). The mean GFP-Lc3a / free GFP ratio observed in wild  
306 type (+/+) embryos at 48 hpf is slightly higher than at 96 hpf (1.22 vs 1.13 in Fig 5A and 5B  
307 respectively). However, similar to the polyQ80-GFP-v2A-GFP assay, this difference is not  
308 statistically significant ( $p=0.42$ ).

309

310 To test whether changes in the GFP-Lc3a / free GFP ratio reflect changes in autophagic flux,  
311 the GFP-Lc3a-GFP construct was expressed in embryos subjected to treatment with  
312 rapamycin or chloroquine. Treatment with rapamycin produced a significant decrease in the  
313 GFP-Lc3a / free GFP ratio ( $p=0.001$ , Fig 5A), reflecting the expected increase in autophagy.

314 Unexpectedly, treatment with chloroquine, both at high (50mM) and low (50μM)  
315 concentrations resulted in significant decreases in the GFP-Lc3a / free GFP ratio (Fig 5A).  
316 This apparent increase in autophagy conflicted with chloroquine's activity as an autophagy  
317 inhibitor, which implied that an unanticipated factor could be distorting the observed ratio  
318 during the chloroquine treatments.

319

320 **Fig 5. Ratios (GFP-Lc3a / free GFP) from the GFP-Lc3a-GFP assay of autophagy.**

321 (A) Embryos at 48 hpf. +/+ embryos were treated with rapamycin, Rapa, or various  
322 concentrations of chloroquine, CQ. *pсен2<sup>S4Ter</sup>* mutant embryos were not treated with these  
323 drugs.

324 (B) +/+ embryos at 96 hpf after treatment with various concentrations of chloroquine.

325 (C) Zebrafish embryos of various genotypes at 96 hpf. Only +/+ embryos were treated with  
326 rapamycin or chloroquine as indicated.

327 p-values are from two-tailed t-tests assuming either equal or unequal variances as  
328 appropriate.

329

330 After investigating the scientific literature we discovered a report from Ni et al. in 2011  
331 describing that both chloroquine and rapamycin treatments of HeLa cells can cause increased  
332 lysosomal pH and cleavage of GFP-LC3 to release free GFP (similar to the removal of polyQ  
333 from polyQ-GFP as observed by Schiffer et al (23)). If this form of cleavage also existed in  
334 zebrafish it might provide an additional source of free GFP that would affect observed  
335 GFP-Lc3a / GFP ratios in embryos expressing the GFP-Lc3a-GFP assay transgene. To test



336 this possibility we constructed a simple fusion of GFP to Lc3a by deleting the downstream  
337 GFP coding sequences from the GFP-Lc3a-GFP transgene to create GFP-Lc3a (Fig 2C). The  
338 GFP-Lc3a transgene was then expressed in zebrafish embryos in the same way as for  
339 GFP-Lc3a-GFP and the rapamycin and chloroquine treatments were then repeated. At 48 hpf,  
340 free GFP (i.e. not fused to Lc3a) can clearly be observed on western immunoblots (Fig 6A),  
341 confirming that a protease activity that separates GFP from Lc3a exists in zebrafish.  
342 Interestingly, the GFP-Lc3a protein from this transgene is apparently observable as both  
343 GFP-Lc3a-I and GFP-Lc3a-II forms whereas we have only observed a single form of  
344 GFP-Lc3a protein when this is produced from the GFP-Lc3a-GFP transgene. A similar  
345 observation was made by Kaizuka et al. (10) for expression of GFP-LC3 from their  
346 GFP-LC3-RFP-LC3ΔG construct when this was expressed from a transgene (as our protein  
347 fusions are) rather than from injected mRNA. The free-GFP derived from our GFP-Lc3a  
348 transgene is certainly non-negligible relative to the observed GFP-Lc3a-I (e.g. in untreated,  
349 wild type embryos, see Fig 6A) at 48 hpf. This implies that free GFP from cleavage of  
350 GFP-Lc3a may significantly affect GFP-Lc3a / GFP ratios from GFP-Lc3a-GFP-injected  
351 embryos at this developmental time point. When we observed cleavage of GFP-Lc3a in 96  
352 hpf larvae, far less free GFP was seen relative to GFP-Lc3a-I. Therefore, the ratio of  
353 GFP-Lc3a to GFP may be less distorted by free GFP from cleavage of GFP-Lc3a at 96 hpf.

354

355 **Fig 6. Western immunoblots from GFP-Lc3a-injected embryos and larvae.**

356 (A) 48 hpf and (B) 96 hpf respectively. +/+ embryos and larvae were also treated with  
357 rapamycin (Rapa) or chloroquine (CQ) as indicated.

358

359

360 When we repeated the chloroquine treatments on GFP-Lc3a-GFP transgene-injected  
361 zebrafish embryos with lysis at 96hpf we then observed a slightly increased GFP-Lc3a / free  
362 GFP ratio at the lowest chloroquine dosage (50 $\mu$ M) although without apparent statistical  
363 significance ( $p=0.6232$ , Fig 5B). At higher concentrations of chloroquine (12.5 mM and  
364 above) the GFP-Lc3a / free GFP ratio was decreased or was very variable (Fig 5B). Ni et al.  
365 reported that saturating doses of chloroquine in HeLa cells are able to block GFP-LC3  
366 cleavage completely (25) and this may also be occurring in some zebrafish embryos treated  
367 with 50 mM chloroquine. A large proportion of larvae (~80%) were dead at 96 hpf after the  
368 50mM chloroquine treatment indicating high lethality of this chloroquine concentration.

369

370 We conclude that exploitation of the GFP-Lc3a-GFP assay is best performed at 96hpf or later  
371 to minimize the influence of generation of free GFP from cleavage of GFP-Lc3a. Generation  
372 of free GFP from cleavage of GFP-Lc3a reduces the sensitivity of the GFP-Lc3a-GFP  
373 construct for detecting decreases in autophagic flux.

374

### 375 **Autophagic flux in zebrafish *pser* mutants expressing GFP-Lc3a-GFP**

376 Our tests of the GFP-Lc3a-GFP assay indicated that, when used at 96 hpf, it can reveal  
377 changes in autophagic flux without the toxicity and other problems encountered with the  
378 aggregation-based polyQ80-GFP-v2A-GFP assay. Therefore, we exploited the  
379 GFP-Lc3a-GFP assay to examine autophagic flux changes in a number of zebrafish

380 *presenilin* mutants that we have generated in our laboratory (S3 File). These are: a typical  
381 fAD-like mutation in *psen1* lacking two codons but preserving the open reading frame,  
382 *psen1*<sup>Q96K97del</sup>; a putatively null mutation of the *psen2* gene, *psen2*<sup>S4Ter</sup>; and a zebrafish model  
383 of the unique, open reading frame-truncating PSEN fAD mutation *PSEN2*<sup>K115Efs</sup> (14). We  
384 have previously suggested that this latter mutation causes fAD by inappropriate mimicry of  
385 expression of an hypoxia-induced, naturally-occurring truncated isoform of PSEN2 denoted  
386 PS2V (26). In zebrafish, the PS2V-equivalent isoform is expressed from the  
387 *PSEN1*-orthologous gene, *psen1*. Therefore, we have modeled this mutation in zebrafish by  
388 generation of the *psen1* allele, *K97Gfs*.

389

390 The effects of the fAD-like mutations were tested in the heterozygous state corresponding to  
391 the dominant inheritance pattern shown by such mutations in humans. The effects of the  
392 putatively null mutation of *psen2* were tested in both homozygous and heterozygous embryos  
393 to examine, respectively, whether *psen2* activity has any effect on autophagy and whether this  
394 effect is haploinsufficient. Fertilized eggs bearing *presenilin* mutations were injected with the  
395 GFP-Lc3a-GFP transgene and then examined by western immunoblotting at 96 hpf (Fig 5C).  
396 Both heterozygosity for the fAD-like *psen1*<sup>Q96K97del</sup> mutation and loss of *psen2* activity were  
397 observed to decrease autophagic flux significantly ( $p=0.0268$  and  $p=0.0086$  respectively) as  
398 expected from previous analysis of fAD mutations in human *PSEN1* (8) and confirming that  
399 *psen2* also functions in autophagy. Heterozygosity for the putatively null mutation in *psen2*  
400 also appeared to reduce the GFP-Lc3a / free GFP ratio indicating decreased autophagic flux  
401 although this did not reach statistical significance ( $p=0.063$ ). Unexpectedly, heterozygosity

402 for the mutation *psen1*<sup>K97Gfs</sup> that models the unique ORF-truncating *K115E* fAD mutation of  
403 human *PSEN2* appeared possibly to increase autophagic flux ( $p=0.0565$ ) reflecting  
404 complexity in the relationship between fAD mutations and this crucial cellular process.

405

## 406 **Discussion**

407

408 To monitor autophagic flux in zebrafish embryos, we first designed the  
409 polyQ80-GFP-v2A-GFP assay that is based on the assumption that polyQ80-GFP aggregates  
410 and is a target for autophagy while free GFP is primarily degraded via the proteasome. Since  
411 this assay provides 1:1 stoichiometric co-expression of polyQ80-GFP and free GFP protein  
412 within the same cells *in vivo* it should reflect changes in autophagic flux by changes in the  
413 ratio of polyQ80-GFP / free GFP as observed by western immunoblotting. Since both the  
414 polyQ80-GFP and the free GFP protein are detected simultaneously by the same primary  
415 antibody, polyQ80-GFP / free GFP ratios can be compared on separate immunoblots which  
416 greatly facilitates experimental replication and statistical analysis. While rapamycin and  
417 chloroquine treatments of embryos injected with the polyQ80-GFP-v2A-GFP transgene  
418 produced ratio changes indicative of the expected changes in autophagic flux, the aggregation  
419 of polyQ80 may, itself, induce autophagy and this would limit the assay's sensitivity. This  
420 issue is overcome by replacing the polyQ80-GFP protein with a non-aggregating GFP-Lc3a  
421 fusion protein, based on the approach taken by Kaizuka et al. (10). Like the  
422 polyQ80-GFP-v2A-GFP construct, the GFP-Lc3a-GFP construct produces 1:1 stoichiometric  
423 co-expression of two proteins in the same cells *in vivo* (GFP-Lc3a and free GFP proteins).

424

425 The GFP-Lc3a-GFP assay assumes that GFP-Lc3a protein is a target of autophagy while the  
426 free GFP protein remains in the cytosol as an internal control. However, the GFP-Lc3a-GFP  
427 transgene should not affect autophagic flux itself nor TORC1 activity as the related  
428 GFP-LC3-RFP-LC3 $\Delta$ G construct of Kaizuka et al. did not appear to do so (10). Nevertheless,  
429 the GFP-Lc3a-GFP assay has its own particular limitations. Cleavage of LC3 away from GFP  
430 was reported in HeLa cells when lysosomal pH was increased by chloroquine or rapamycin  
431 treatments (25). Consistent with this, we also saw production of free GFP by cleavage of  
432 GFP-Lc3a in zebrafish embryos and larvae (Fig 6A and 5B). Since the free GFP produced by  
433 GFP-Lc3a cleavage provided an additional source of free GFP, this can affect the measured  
434 ratio of GFP-Lc3a / free GFP and this reduces the sensitivity of the assay to detect decreases  
435 in autophagic flux. We found that this effect was minimized at 96 hpf compared to 48 hpf.  
436 (Note that the observations by Schiffer et al. imply that polyQ80-GFP will also form free  
437 GFP by removal of polyQ80 in zebrafish embryos (23).)

438

439 It is possible that development of a GFP-Lc3a-RFP-GFP transgene-based autophagy assay  
440 might overcome the insensitivity caused by generation of free GFP from GFP-Lc3a since an  
441 RFP-GFP fusion would be easy to identify separately from any free GFP in western  
442 immunoblotting. The accumulation of free GFP versus GFP-Lc3a in such an assay would be  
443 additionally informative regarding autophagic flux versus lysosomal accumulation.

444

445 Using the GFP-Lc3a-GFP assay, we were able to compare the levels of autophagic flux in  
446 zebrafish mutant and wild type larvae. In both *psen2*<sup>S4Ter/+</sup> and *psen2*<sup>S4Ter/psen2</sup><sup>S4Ter</sup> larvae,  
447 we detected decreased autophagic flux (Fig 5C), demonstrating that *psen2*, like *psen1*, plays a  
448 role in regulating cells' autophagic activity. This has not previously been shown. However,  
449 we should note that, in terms of Psen2 protein's role in  $\gamma$ -secretase activity, our previous work  
450 has shown that zebrafish Psen2 plays a greater role in Notch signaling than its corresponding  
451 mammalian orthologue (27) and we cannot exclude that zebrafish Psen2 is more similar to  
452 Psen1 in its role in autophagy than mammalian PSEN2 is similar to PSEN1. In heterozygous  
453 larvae of the "typical" (reading frame-preserving) fAD mutation model *psen1*<sup>Q96K97del</sup>, we  
454 also observed decreased autophagic flux (Fig 5C). Interestingly, our zebrafish model of the  
455 human *PSEN2*<sup>K115Efs</sup> fAD mutation, *psen1*<sup>K97Gfs</sup>, did not show decreased autophagic flux.  
456 Instead, heterozygosity for this mutation appeared possibly to increase autophagic flux in the  
457 GFP-Lc3a-GFP assay.

458

459 The *K115Efs* mutation of human *PSEN2* is unique among the human *PRESENILIN* fAD  
460 mutations in that it truncates the open reading frame of the gene. Nevertheless, our  
461 unpublished analyses of aged adult fish modelling this mutation show similar alterations in  
462 expression of the genes responding to hypoxia to those seen in aged fish carrying the more  
463 "typical" fAD-like mutation *Q96K97del* (Newman et al. *manuscript in preparation*).  
464 Therefore, it will be interesting to examine autophagic flux in such aged fish to see whether it  
465 subsequently becomes inhibited (as is typical in Alzheimer's disease (4)). To this end, we are

466 currently determining whether the GFP-Lc3a-GFP transgene can be transmitted through the  
467 zebrafish germline for widespread expression in adult tissues.

468

469 The possibly increased autophagic flux observed due to heterozygosity for the reading  
470 frame-truncating *psen1*<sup>K97Gfs</sup> mutation argues against the idea that the human *PSEN2*<sup>K115Efs</sup>  
471 mutation, or the zebrafish *psen1*<sup>K97Gfs</sup> model of it, represent hypomorphic alleles as such  
472 alleles would be expected to decrease autophagic flux (e.g. see (8) and the putatively *psen2*  
473 null allele analysis of this paper). In fact, our results suggest that this truncated form of  
474 PRESENILIN, and the naturally occurring PS2V isoform that it supposedly mimics, may  
475 interact with PRESENILIN holoproteins to increase their function in autophagy. Induction of  
476 autophagy is a pro-survival response to cellular stresses such as hypoxia (28) and we have  
477 previously shown using zebrafish that PS2V acts to decrease cell death under such conditions  
478 (26). The observation of increased autophagic flux in zebrafish larvae expressing *psen1*<sup>K97Gfs</sup>  
479 is consistent with this.

480

481 In summary, we tested two GFP-based assays intended to detect changes in autophagic flux  
482 in zebrafish embryos and larvae by western immunoblotting: polyQ80-GFP-v2A-GFP and  
483 GFP-Lc3a-GFP. Both transgenes provide 1:1 stoichiometric co-expression of an autophagy  
484 target protein and of free GFP as an internal control. The two assays both appeared able to  
485 reflect changes in autophagic flux although each assay displayed particular limitations. Using  
486 the GFP-Lc3a-GFP assay, we found that lack of *psen2* activity in zebrafish reduces  
487 autophagic flux as does heterozygosity for a typically reading-frame-preserving fAD-like

488 mutation of *psen1* (*Q96K97del*).

489

## 490 **References**

491

492 1. Boland B, Kumar A, Lee S, Platt FM, Wegiel J, Yu WH, et al. Autophagy induction and autophagosome  
493 clearance in neurons: relationship to autophagic pathology in Alzheimer's disease. *J Neurosci.*  
494 2008;28(27):6926-37.

495 2. Orr ME, Oddo S. Autophagic/lysosomal dysfunction in Alzheimer's disease. *Alzheimers Res Ther.*  
496 2013;5(5).

497 3. Yu WH, Cuervo AM, Kumar A, Peterhoff CM, Schmidt SD, Lee JH, et al. Macroautophagy--a novel  
498 Beta-amyloid peptide-generating pathway activated in Alzheimer's disease. *J Cell Biol.* 2005;171(1):87-98.

499 4. Nixon RA, Wegiel J, Kumar A, Yu WH, Peterhoff C, Cataldo A, et al. Extensive Involvement of Autophagy in  
500 Alzheimer Disease: An Immuno-Electron Microscopy Study. *Journal of Neuropathology & Experimental*  
501 *Neurology.* 2005;64(2):113-22.

502 5. Area-Gomez E, de Groof AJ, Boldogh I, Bird TD, Gibson GE, Koehler CM, et al. Presenilins are enriched in  
503 endoplasmic reticulum membranes associated with mitochondria. *Am J Pathol.* 2009;175(5):1810-6.

504 6. Pottier C, Hannequin D, Coutant S, Rovelet-Lecrux A, Wallon D, Rousseau S, et al. High frequency of  
505 potentially pathogenic SORL1 mutations in autosomal dominant early-onset Alzheimer disease. *Mol Psychiatry.*  
506 2012;17(9):875-9.

507 7. Jayne T, Newman M, Verdile G, Sutherland G, Munch G, Musgrave I, et al. Evidence For and Against a  
508 Pathogenic Role of Reduced gamma-Secretase Activity in Familial Alzheimer's Disease. *J Alzheimers Dis.*  
509 2016;52(3):781-99.

510 8. Lee JH, Yu WH, Kumar A, Lee S, Mohan PS, Peterhoff CM, et al. Lysosomal proteolysis and autophagy  
511 require presenilin 1 and are disrupted by Alzheimer-related PS1 mutations. *Cell.* 2010;141(7):1146-58.

512 9. Zhang X, Garbett K, Veeraghavulu K, Wilburn B, Gilmore R, Mirnics K, et al. A role for presenilins in  
513 autophagy revisited: normal acidification of lysosomes in cells lacking PSEN1 and PSEN2. *J Neurosci.*  
514 2012;32(25):8633-48.

515 10. Kaizuka T, Morishita H, Hama Y, Tsukamoto S, Matsui T, Toyota Y, et al. An Autophagic Flux Probe that  
516 Releases an Internal Control. *Mol Cell.* 2016;64(4):835-49.

517 11. Clark KJ, Urban MD, Skuster KJ, Ekker SC. Transgenic zebrafish using transposable elements. *Methods Cell*  
518 *Biol.* 2011;104:137-49.

519 12. Provost E, Rhee J, Leach SD. Viral 2A peptides allow expression of multiple proteins from a single ORF in  
520 transgenic zebrafish embryos. *Genesis.* 2007;45(10):625-9.

521 13. Kawakami K. Tol2: a versatile gene transfer vector in vertebrates. *Genome Biol.* 2007;8(1).

522 14. Jayadev S, Leverenz JB, Steinbart E, Stahl J, Klunk W, Yu CE, et al. Alzheimer's disease phenotypes and  
523 genotypes associated with mutations in presenilin 2. *Brain.* 2010;133(Pt 4):1143-54.

524 15. E3 medium (for zebrafish embryos) [database on the Internet]2011 [cited October 1, 2011]. Available  
525 from: <http://cshprotocols.cshlp.org/content/2011/10/pdb.rec66449.short>.

526 16. Ganesan S, Moussavi Nik SH, Newman M, Lardelli M. Identification and expression analysis of the  
527 zebrafish orthologues of the mammalian MAP1LC3 gene family. *Exp Cell Res.* 2014;328(1):228-37.

528 17. Ju J-S, Miller SE, Jackson E, Cadwell K, Piwnicka-Worms D, Wehl CC. Quantitation of selective autophagic  
529 protein aggregate degradation in vitro and in vivo using luciferase reporters. *Autophagy.* 2009



- 530 2009/05/16;5(4):511-9.
- 531 18. Grunwald DJ, Eisen JS. Headwaters of the zebrafish [mdash] emergence of a new model vertebrate. *Nat*  
532 *Rev Genet.* [10.1038/nrg892]. 2002;3(9):717-24.
- 533 19. Fleming A, Rubinsztein DC. Zebrafish as a model to understand autophagy and its role in neurological  
534 disease. *Biochimica et Biophysica Acta (BBA) - Molecular Basis of Disease.* 2011;1812(4):520-6.
- 535 20. Yoon YH, Cho KS, Hwang JJ, Lee SJ, Choi JA, Koh JY. Induction of lysosomal dilatation, arrested autophagy,  
536 and cell death by chloroquine in cultured ARPE-19 cells. *Invest Ophthalmol Vis Sci.* 2010;51(11):6030-7.
- 537 21. Cui J, Sim TH-F, Gong Z, Shen H-M. Generation of transgenic zebrafish with liver-specific expression of  
538 EGFP-Lc3: A new in vivo model for investigation of liver autophagy. *Biochemical and Biophysical Research*  
539 *Communications.* 2012 2012/06/01/;422(2):268-73.
- 540 22. He C, Bartholomew CR, Zhou W, Klionsky DJ. Assaying autophagic activity in transgenic GFP-Lc3 and  
541 GFP-Gabarap zebrafish embryos. *Autophagy.* 2009;5(4):520-6.
- 542 23. Schiffer NW, Broadley SA, Hirschberger T, Tavan P, Kretzschmar HA, Giese A, et al. Identification of  
543 anti-prion compounds as efficient inhibitors of polyglutamine protein aggregation in a zebrafish model. *J Biol*  
544 *Chem.* 2007;282(12):9195-203.
- 545 24. van Bebber F, Paquet D, Hruscha A, Schmid B, Haass C. Methylene blue fails to inhibit Tau and  
546 polyglutamine protein dependent toxicity in zebrafish. *Neurobiol Dis.* 2010;39(3):265-71.
- 547 25. Ni HM, Bockus A, Wozniak AL, Jones K, Weinman S, Yin XM, et al. Dissecting the dynamic turnover of  
548 GFP-LC3 in the autolysosome. *Autophagy.* 2011;7(2):188-204.
- 549 26. Moussavi Nik SH, Newman M, Wilson L, Ebrahimie E, Wells S, Musgrave I, et al. Alzheimer's  
550 disease-related peptide PS2V plays ancient, conserved roles in suppression of the unfolded protein response  
551 under hypoxia and stimulation of gamma-secretase activity. *Hum Mol Genet.* 2015;26.
- 552 27. Selkoe D, Kopan R. Notch and Presenilin: regulated intramembrane proteolysis links development and  
553 degeneration. *Annu Rev Neurosci.* 2003;26:565-97.
- 554 28. Mazure NM, Pouyssegur J. Hypoxia-induced autophagy: cell death or cell survival? *Current Opinion in Cell*  
555 *Biology.* 2010 2010/04/01/;22(2):177-80.

556

557

## 558 **Supporting information**

### 559 **S1 File. Sequence design and sub-cloning for the GFP-based constructs.**

560 (A) Sequence design for the polyQ80-GFP-v2A-GFP construct

561 (B) Sequence design for the GFP-Lc3a-GFP construct

562 (C) Sequence design for the GFP-Lc3a construct

563 (D) Sub-cloning of the GFP-based constructs into the Tol2 vector

564

### 565 **S2 File. Intensity ratios of western immunoblots**

566 Table 1. Intensity ratios of western immunoblots for Figure 3B

567 Table 2. Intensity ratios of western immunoblots for Figure 3D

568 Table 3. Intensity ratios of western immunoblots for Figure 5A

569 Table 4. Intensity ratios of western immunoblots for Figure 5B

570 Table 5. Intensity ratios of western immunoblots for Figure 5C

571

572 **S3 File. Mutagenesis and breeding of the mutant fish**

573 (A) Mutagenesis and breeding of the *psen2*<sup>S4Ter</sup> zebrafish

574 (B) Mutagenesis and breeding of the *psen1*<sup>Q96K97del</sup> and *psen1*<sup>K97Gfs</sup> zebrafish

575

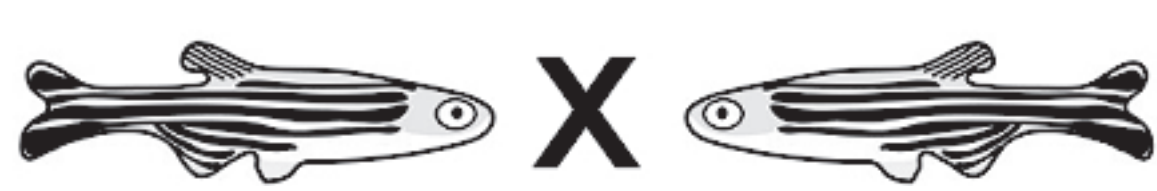

**Mass mating or pair-mating**

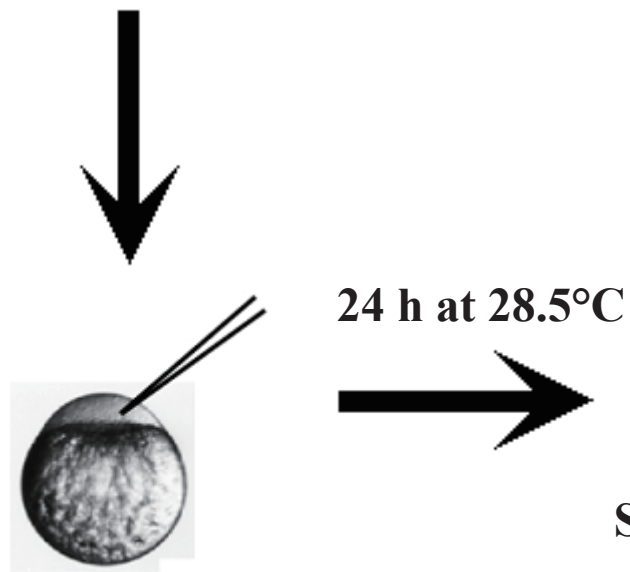

**Microinjection**

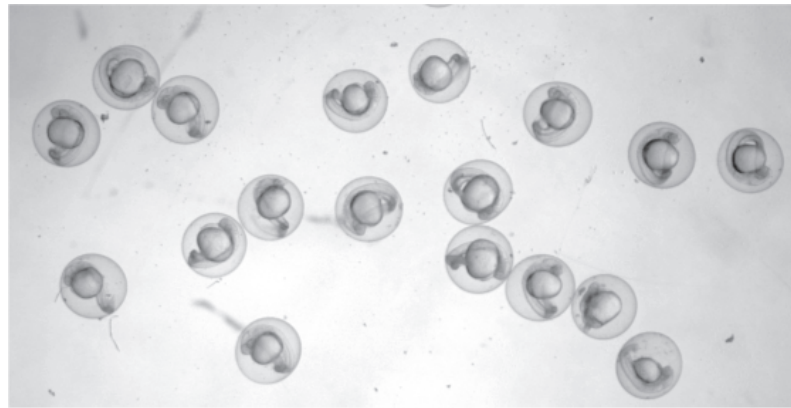

**Select embryos with widespread GFP expression**

bioRxiv preprint doi: <https://doi.org/10.1101/272351>; this version posted February 26, 2018. The copyright holder for this preprint (which was not certified by peer review) is the author/funder. All rights reserved. No reuse allowed without permission.

**DRUG TREATMENT ETC.**

**Larva (after 48 hpf)**

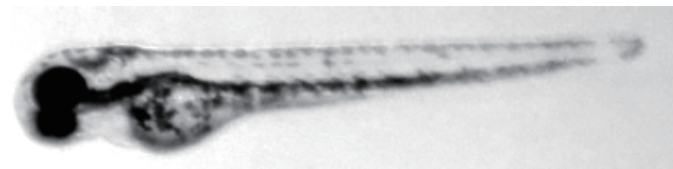

**Lysis**

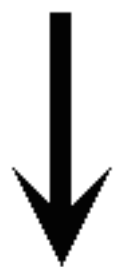

**Experimental replicates etc. are comparable across multiple western immunoblots**

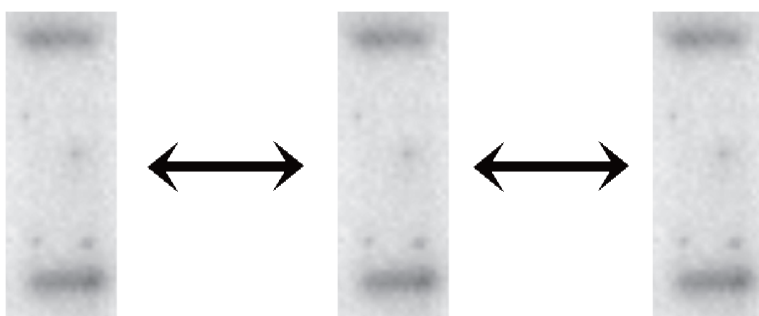

• • •

**Embryo (up to 48 hpf)**

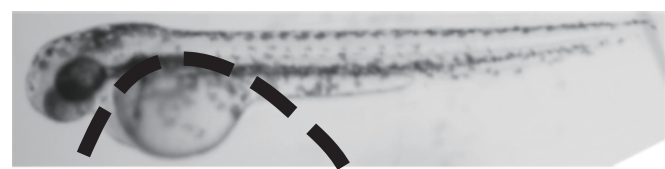

**Remove yolk**

**Lysis**

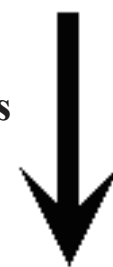

**Experimental replicates etc. are comparable across multiple western immunoblots**

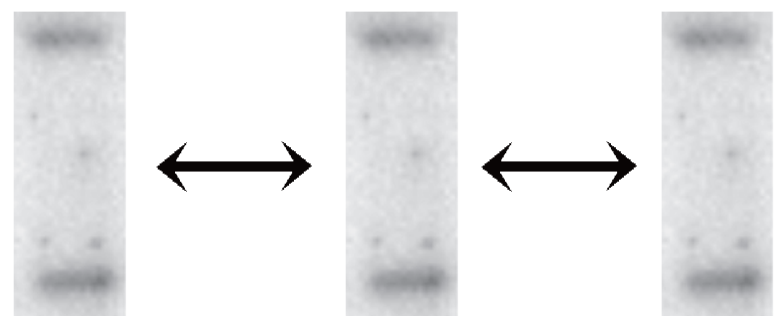

• • •

A

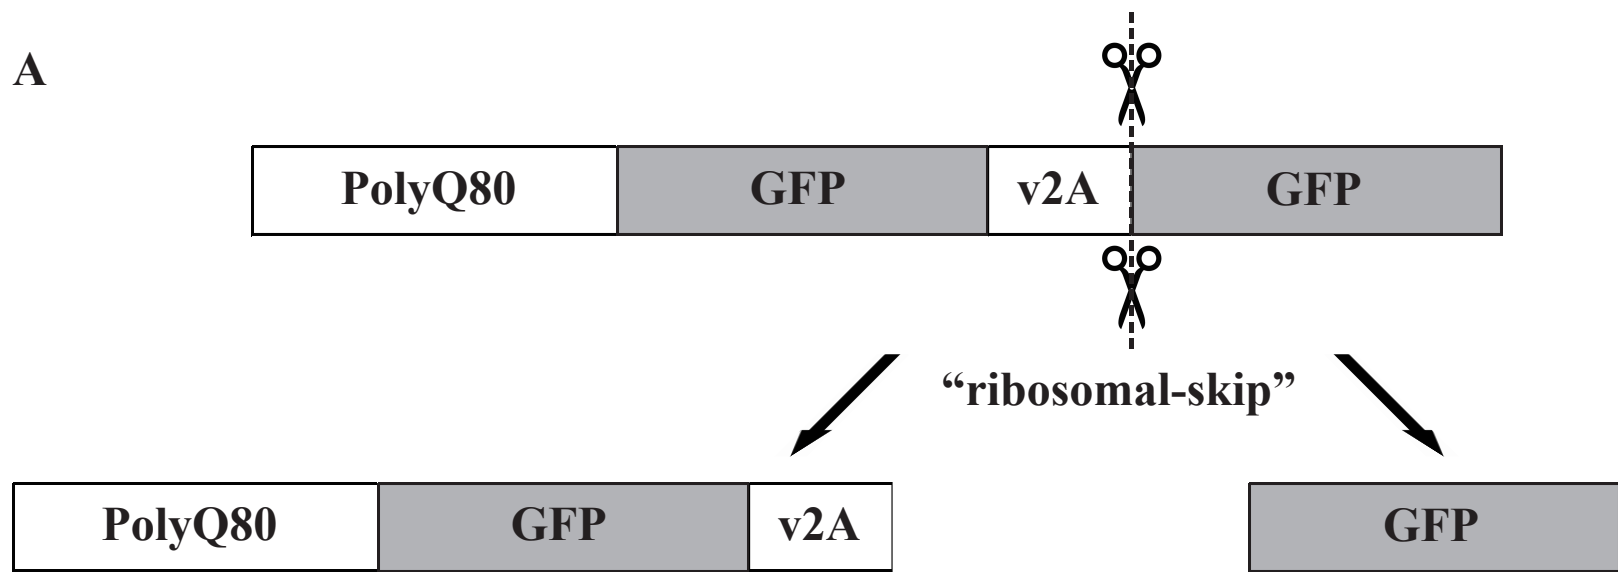

B

bioRxiv preprint doi: <https://doi.org/10.1101/272351>; this version posted February 26, 2018. The copyright holder for this preprint (which was not certified by peer review) is the author/funder. All rights reserved. No reuse allowed without permission.

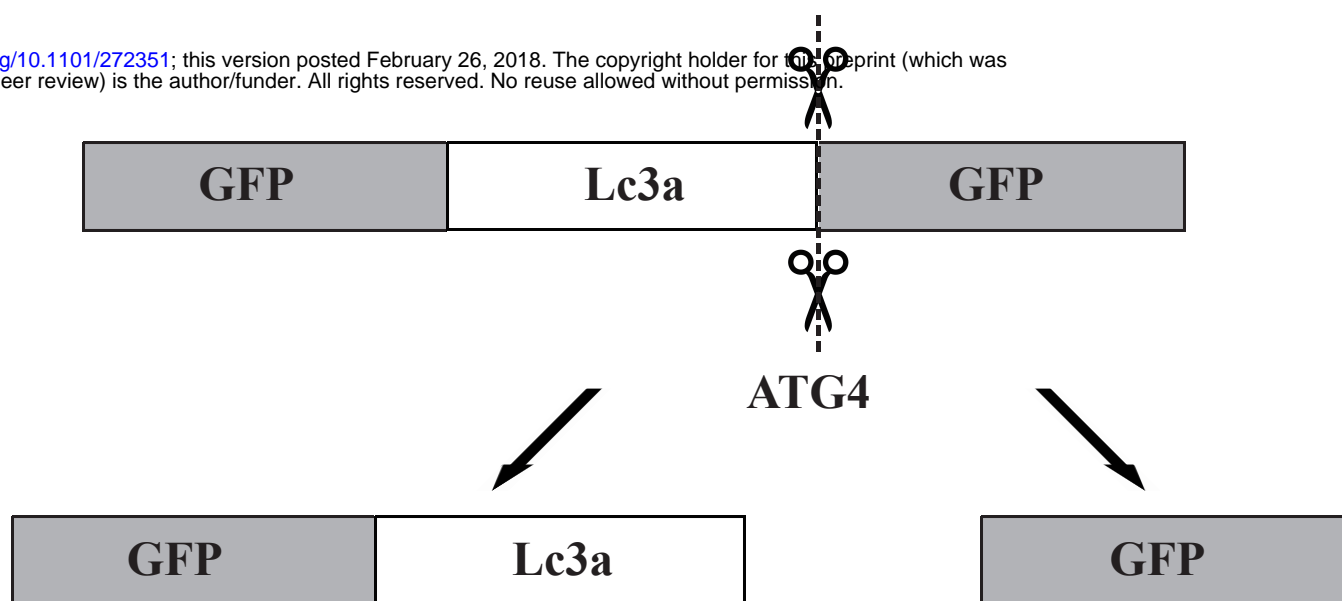

C

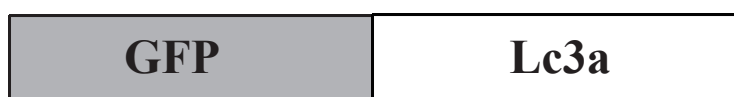

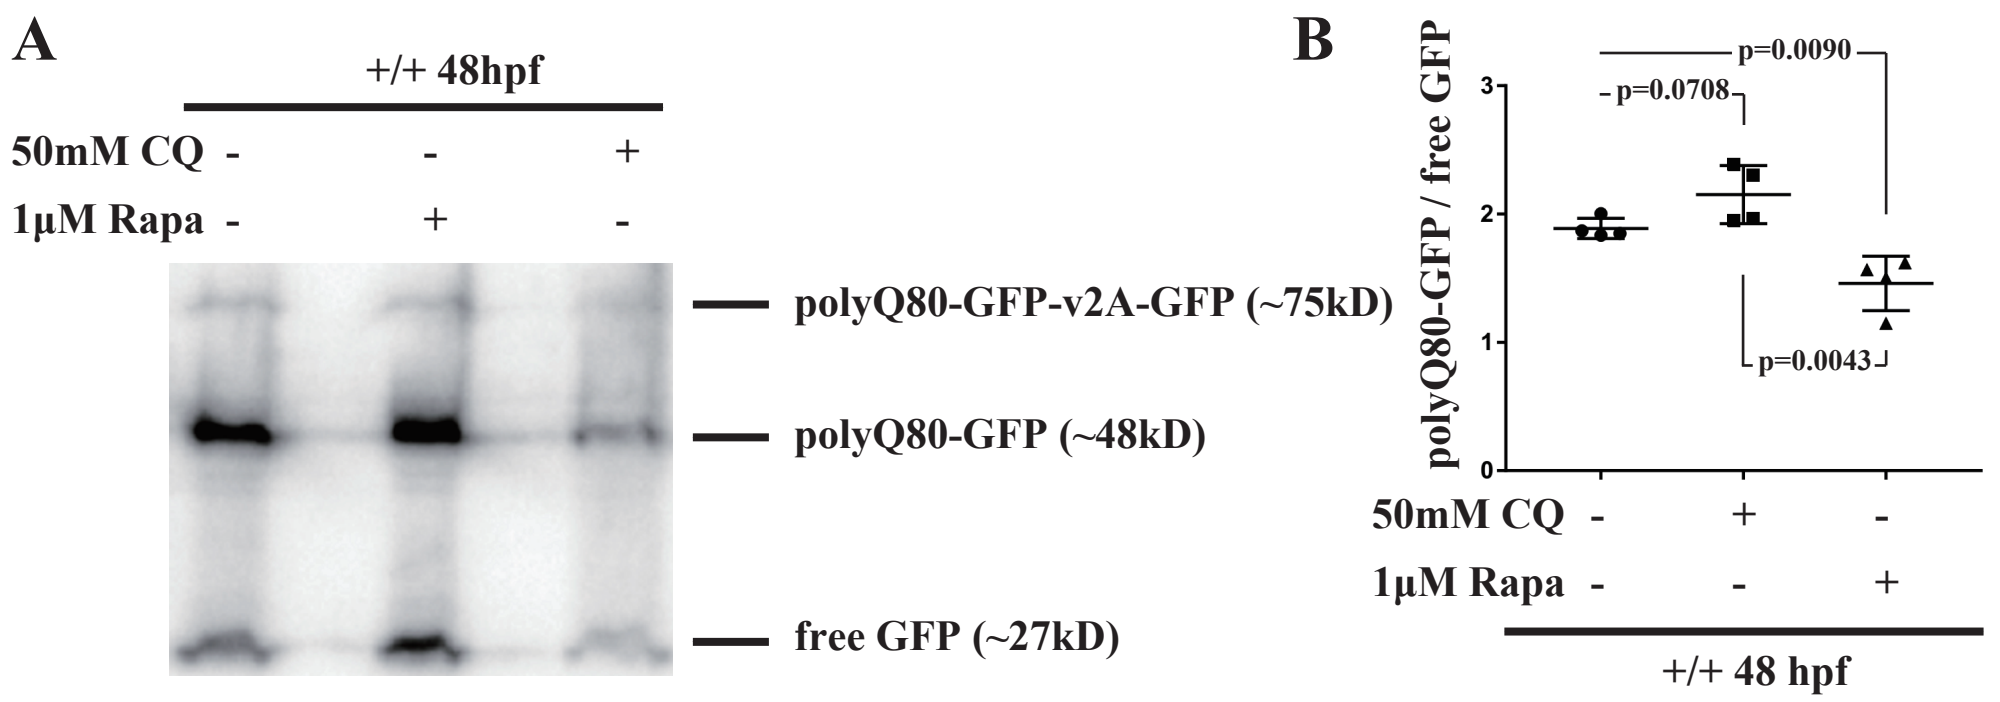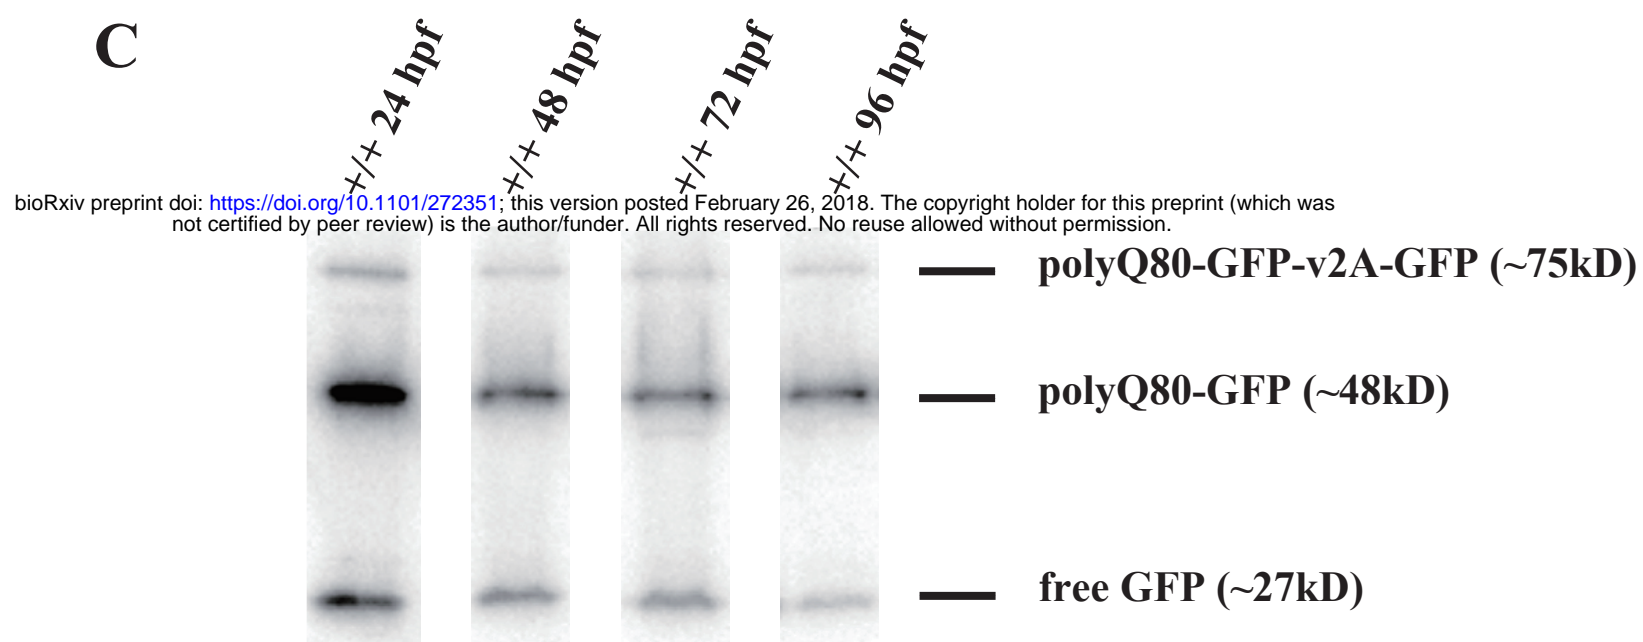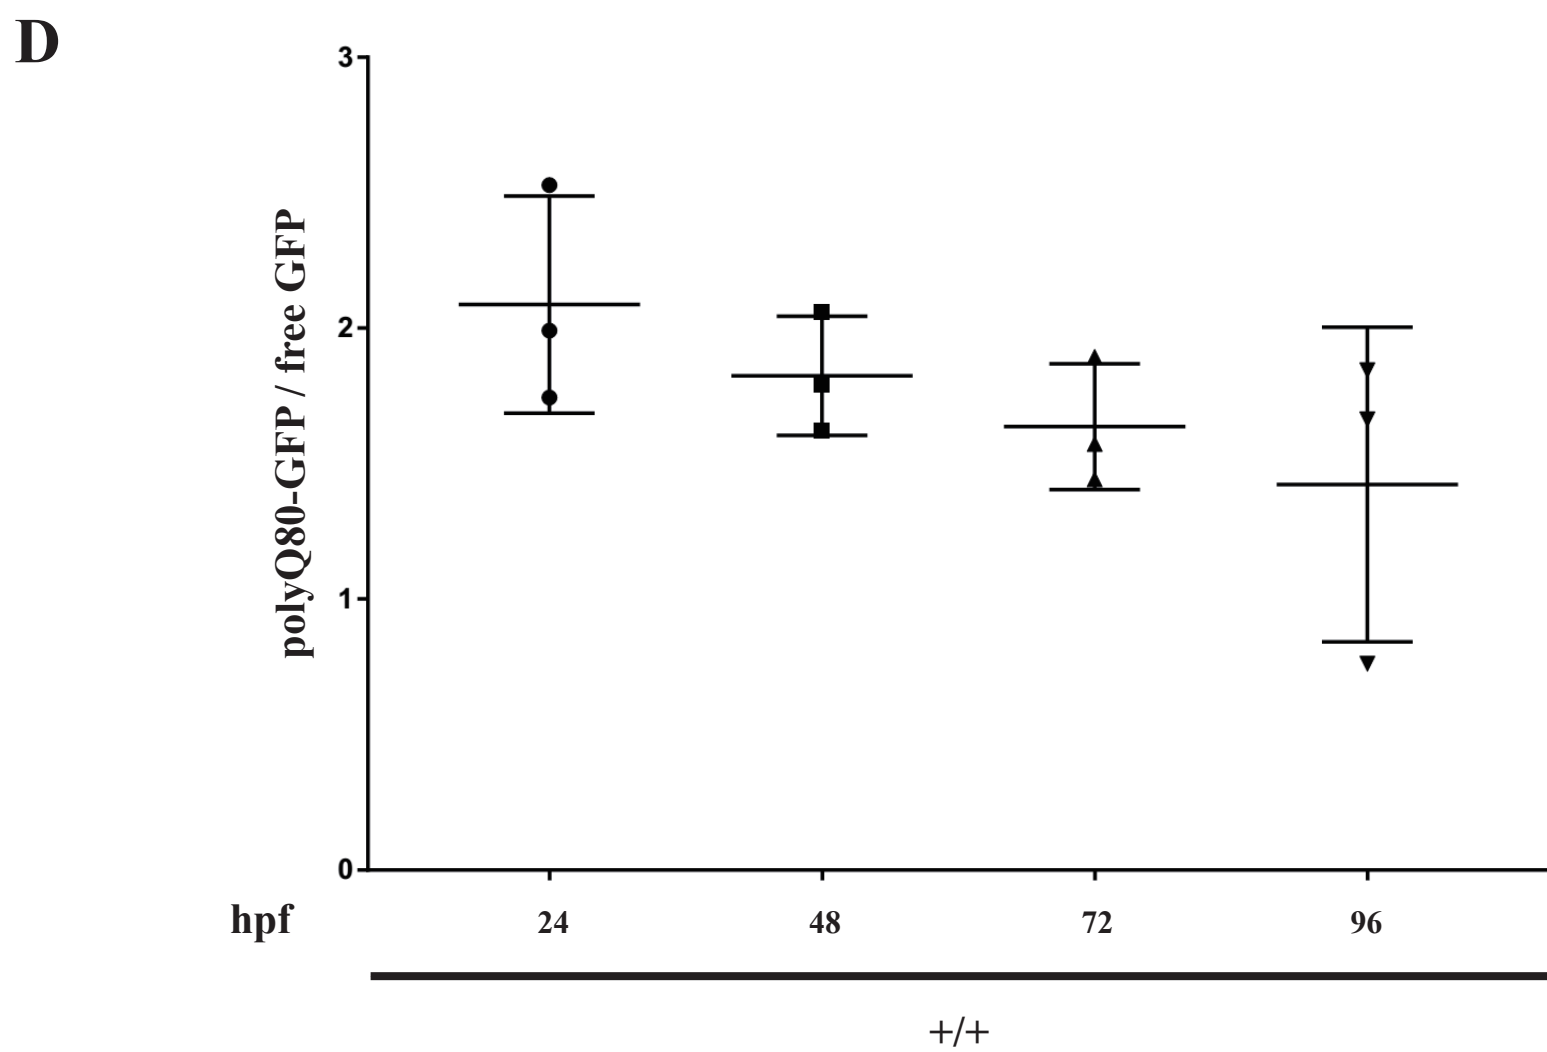

**A**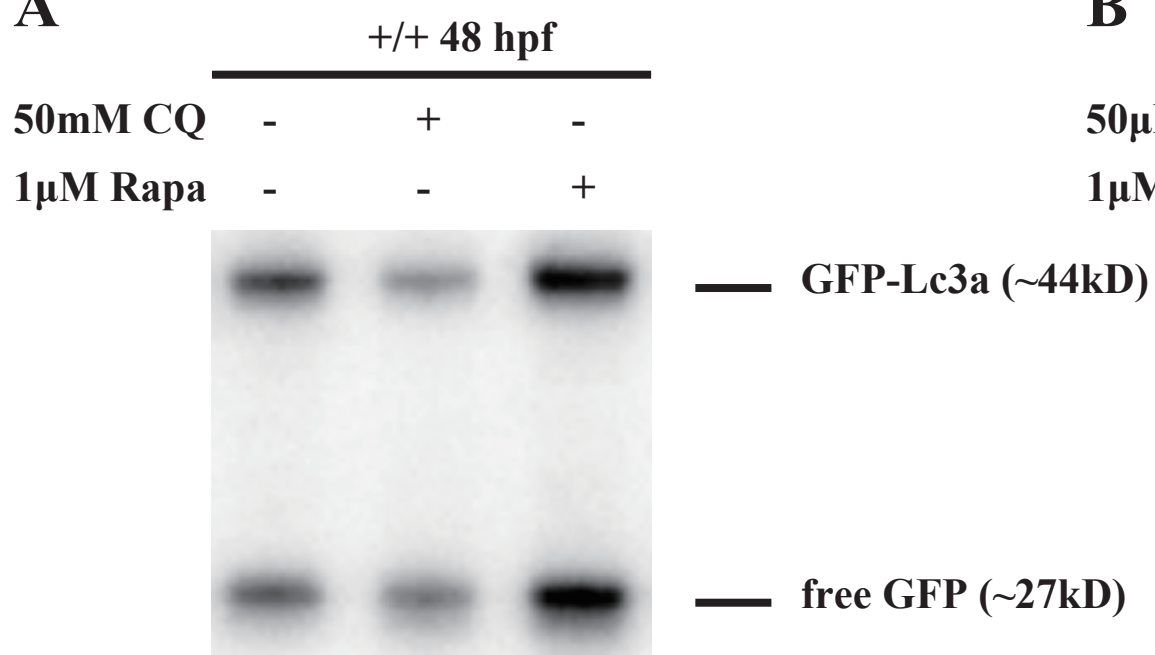**B**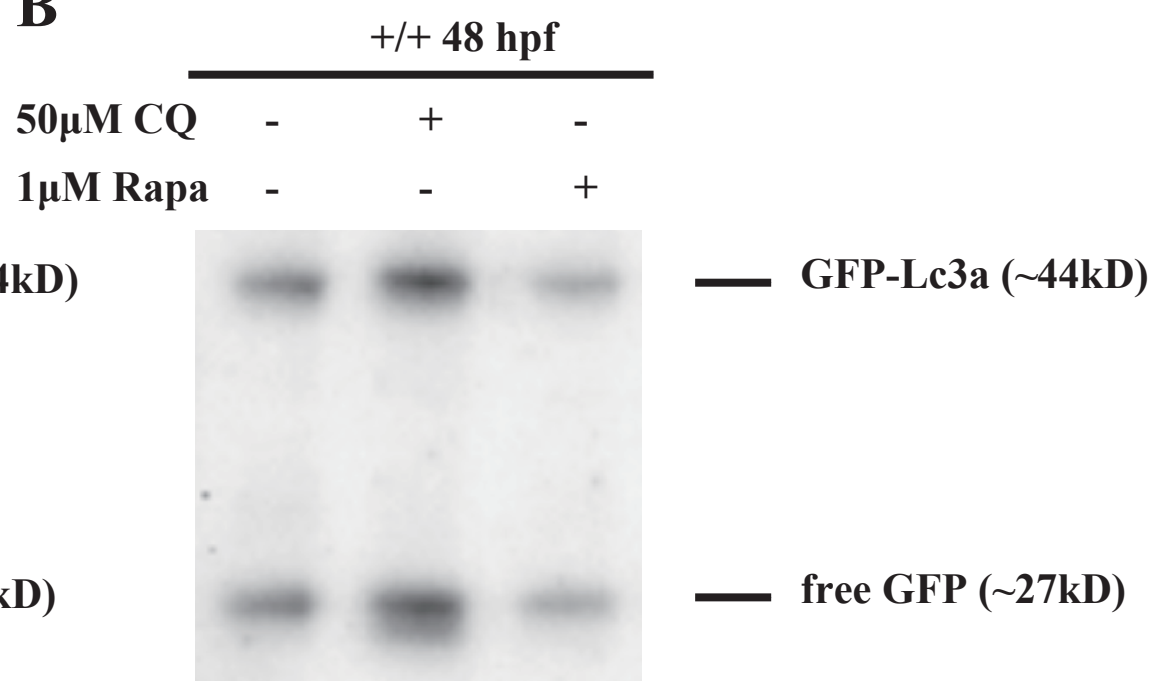**C**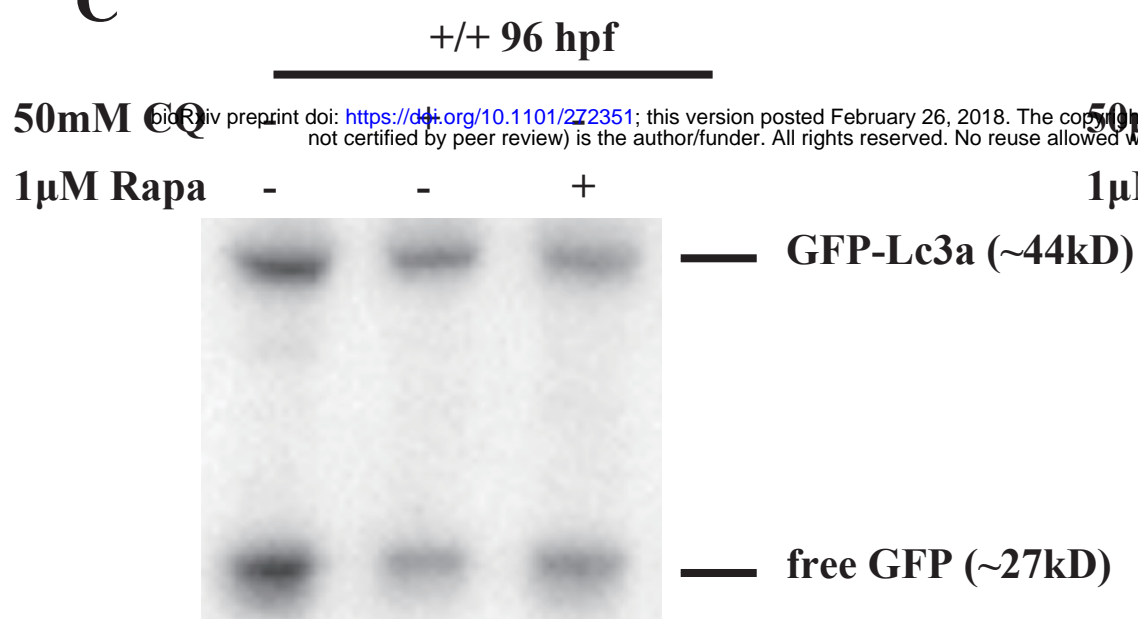**D**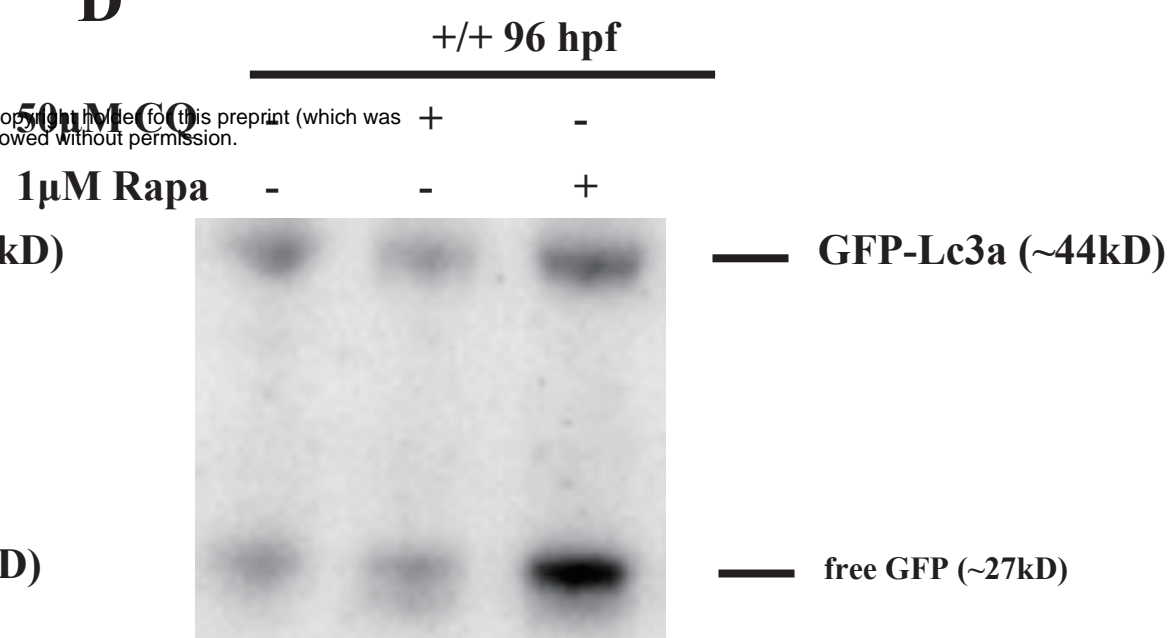**E**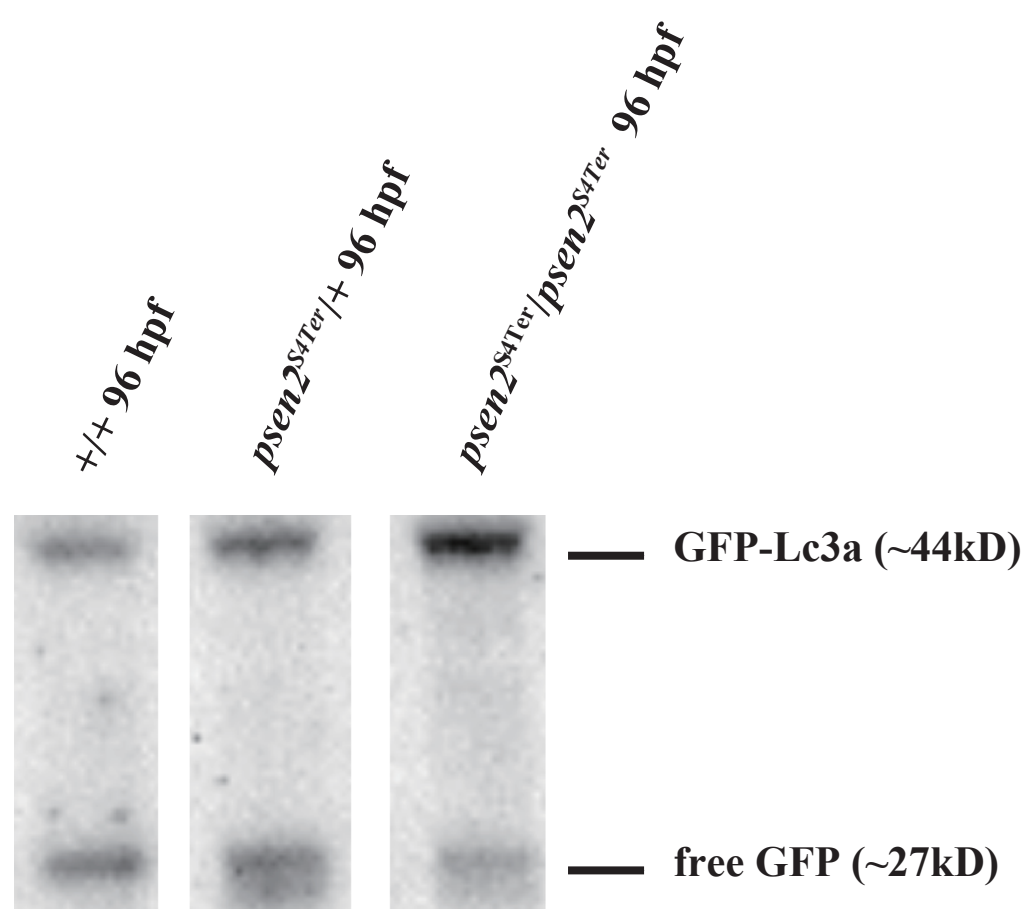**F**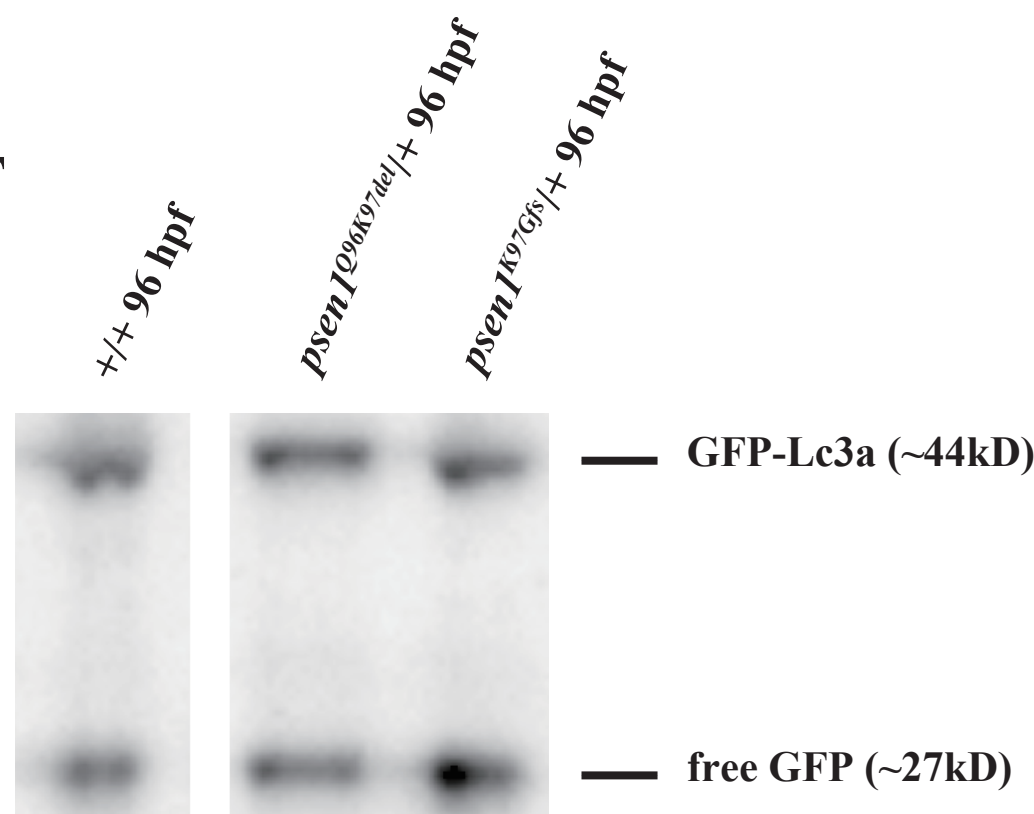

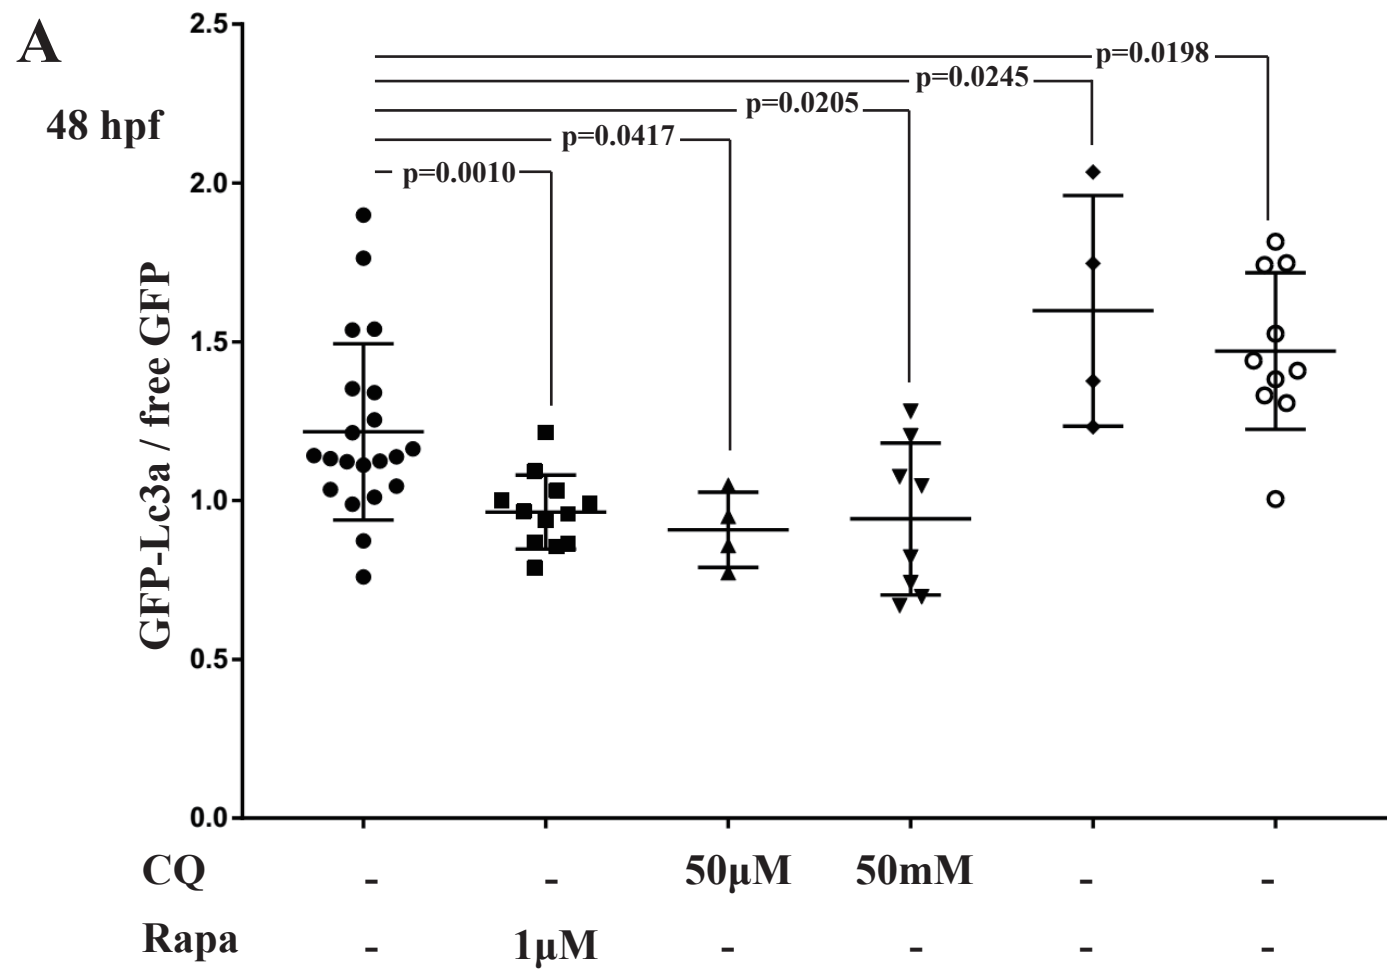

bioRxiv preprint doi: <https://doi.org/10.1101/272351>; this version posted February 26, 2018. The copyright holder for this preprint (which was not certified by peer review) is the author/funder. All rights reserved. No reuse allowed without permission.

*psen2<sup>S4Ter</sup>/+*  
*psen2<sup>S4Ter</sup>/psen2<sup>S4Ter</sup>*

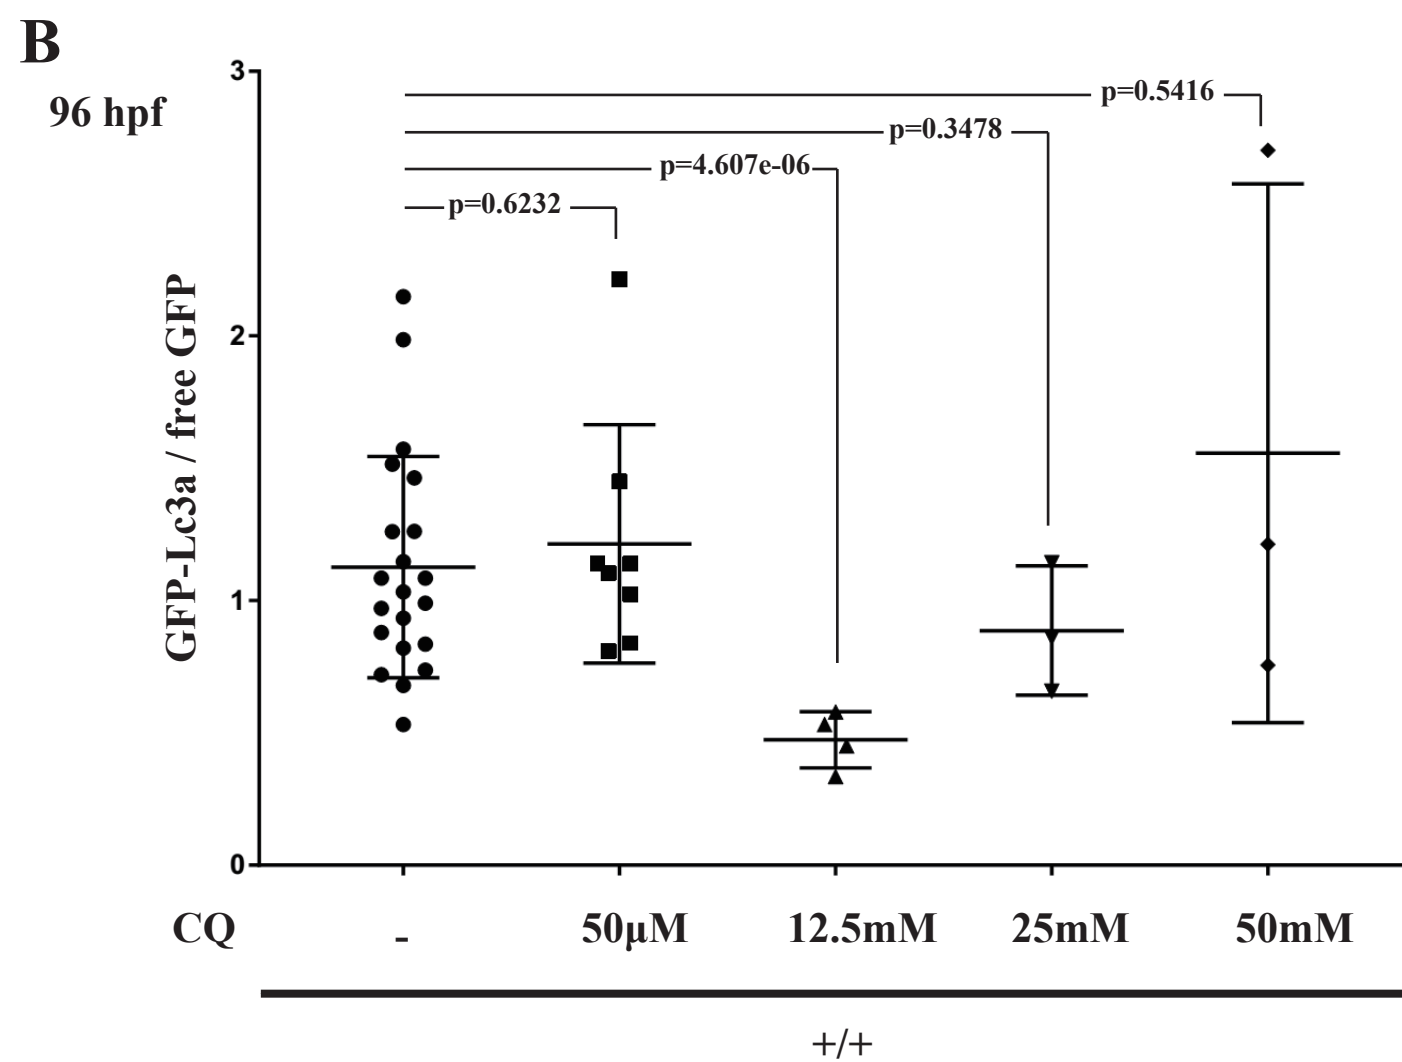

**C**  
96 hpf

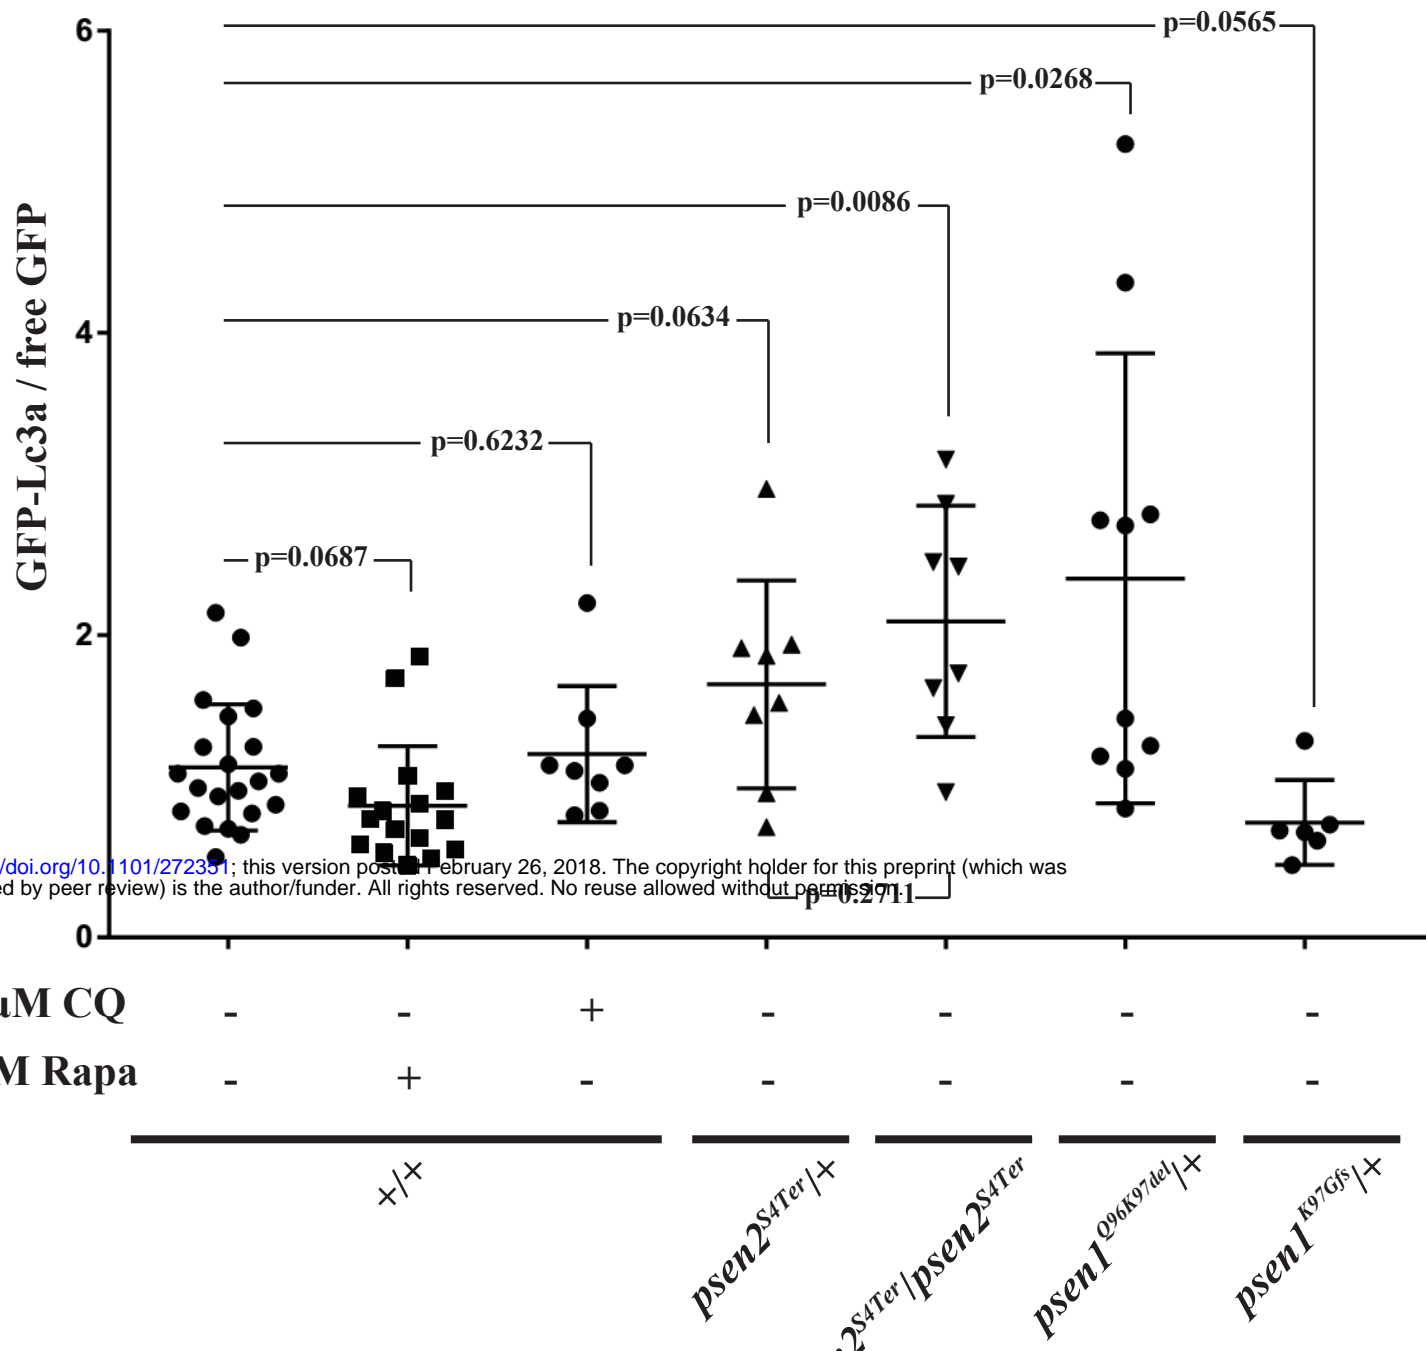



**A**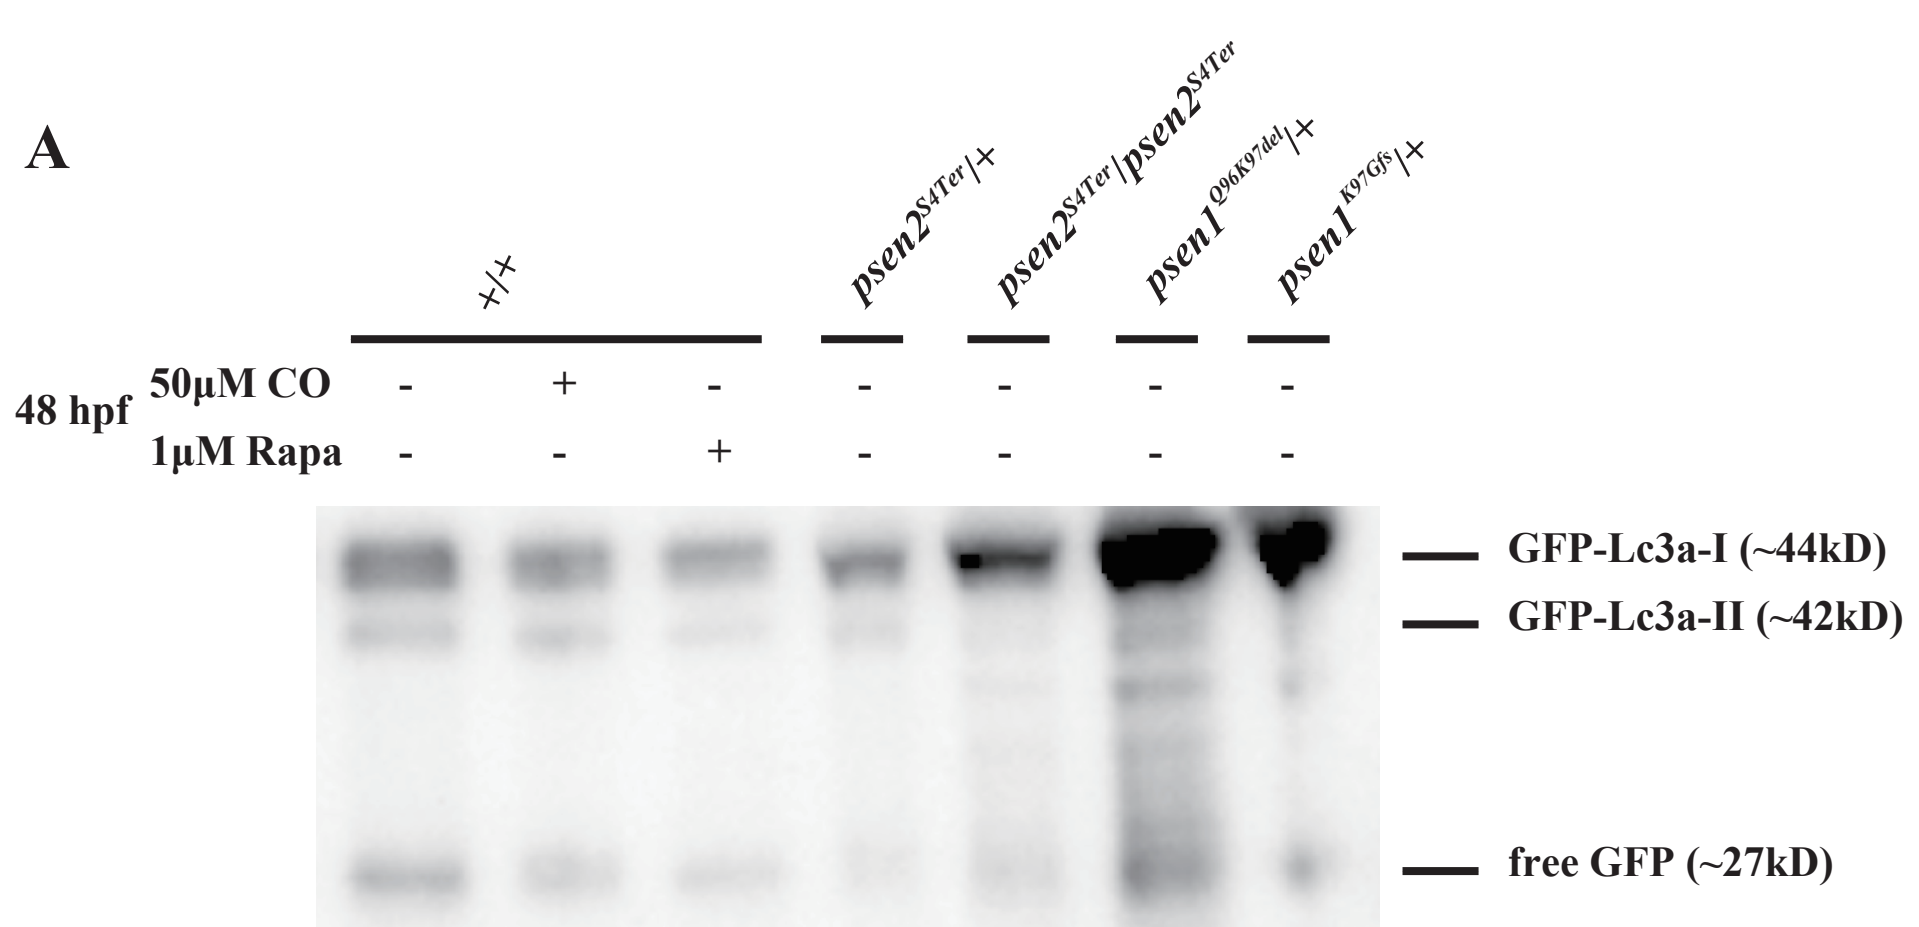

bioRxiv preprint doi: <https://doi.org/10.1101/272351>; this version posted February 26, 2018. The copyright holder for this preprint (which was not certified by peer review) is the author/funder. All rights reserved. No reuse allowed without permission.

**B**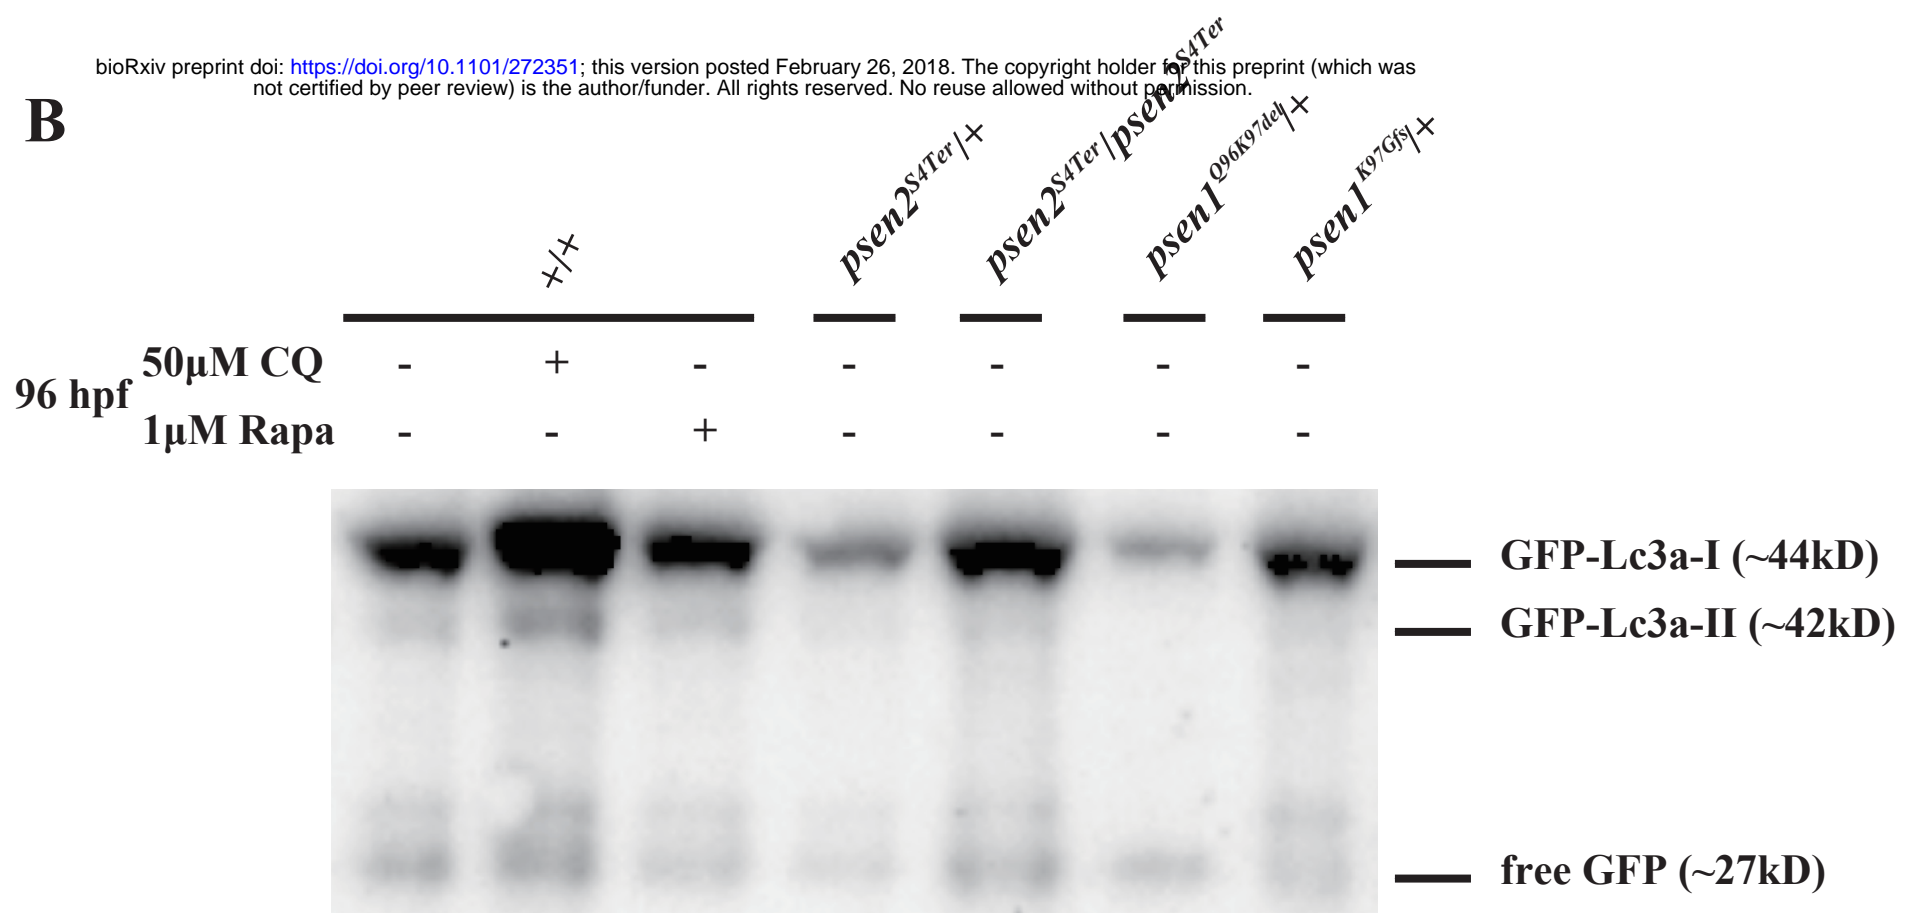

Source: https://www.biorxiv.org/content/10.1101/272351v1.full.pdf
